# Supplementary material for: Pyridine versus acetonitrile coordination in rhodium–N-heterocyclic carbene square-planar complexes
Source: Royal Society of Chemistry journal article supplement (doi:10.1039/c5dt00182j), 2015-01-01
Supplement: c5dt00182j1.pdf [file c5dt00182j1.pdf]

# Pyridine versus Acetonitrile Coordination in Rhodium–N-Heterocyclic Carbene Square-Planar Complexes

Laura Palacios, Andrea Di Giuseppe, Ricardo Castarlenas,\* Fernando J. Lahoz, Jesús J. Pérez-Torrente, Luis A. Oro

## Cartesian Coordinates and Energy Values for DFT Calculated Complexes

### Complex **3at**

E= -2291.09544366 a.u.

G= -2290.302111 a.u.

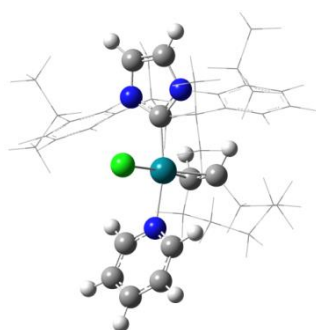

|    |             |             |             |   |             |             |             |
|----|-------------|-------------|-------------|---|-------------|-------------|-------------|
| Rh | -0.30238400 | 0.90892200  | -0.25902500 | C | 4.83281600  | -0.40574300 | -1.45786500 |
| Cl | -1.44119100 | 0.97637300  | -2.39506900 | H | 5.85674700  | -0.03662200 | -1.49827000 |
| N  | -0.88474200 | 2.98232600  | -0.22059800 | C | 3.92755700  | -0.04575700 | -2.44676800 |
| N  | 0.86494000  | -1.74928600 | -1.22231100 | H | 4.25142400  | 0.59690700  | -3.26470600 |
| N  | -1.10972300 | -1.98082500 | -0.39166300 | C | 2.60585500  | -0.49611100 | -2.41838100 |
| C  | -2.11175000 | 3.25069700  | 0.25192500  | C | 1.65728100  | -0.16704000 | -3.54712000 |
| H  | -2.60522900 | 2.43160200  | 0.77683100  | H | 0.63016100  | -0.35291100 | -3.20465400 |
| C  | -2.73003300 | 4.47981900  | 0.07960900  | C | 1.71213500  | 1.29759300  | -3.96364000 |
| H  | -3.72614500 | 4.64347100  | 0.48355200  | H | 1.52821200  | 1.95281300  | -3.10172200 |
| C  | -2.05648100 | 5.47637700  | -0.61711500 | H | 0.92456900  | 1.50058300  | -4.70045800 |
| H  | -2.51348800 | 6.45239100  | -0.77028300 | H | 2.67652300  | 1.56788300  | -4.41929700 |
| C  | -0.79359100 | 5.19769600  | -1.12388400 | C | 1.94355700  | -1.08314000 | -4.73768300 |
| H  | -0.23301000 | 5.93832900  | -1.68893700 | H | 1.23055100  | -0.88997400 | -5.55028000 |
| C  | -0.24981300 | 3.93901500  | -0.90901700 | H | 1.86257100  | -2.14416500 | -4.46207200 |
| H  | 0.72708600  | 3.66905600  | -1.30629200 | H | 2.95841400  | -0.91923300 | -5.13086200 |
| C  | 1.43654800  | 1.12105400  | 0.93163900  | C | 2.74276500  | -2.66701500 | 0.77402700  |
| H  | 2.08552900  | 0.27380700  | 0.68841600  | H | 1.66408100  | -2.86715400 | 0.70253100  |
| C  | 0.34463400  | 0.87991600  | 1.79057000  | C | 2.99423900  | -2.06990300 | 2.15666100  |
| H  | 0.23061800  | -0.14176500 | 2.16119000  | H | 2.43533900  | -1.13463100 | 2.29864000  |
| C  | -0.23613800 | 1.89782800  | 2.73824400  | H | 2.67320100  | -2.77700800 | 2.93576900  |
| H  | -0.31391400 | 2.88738200  | 2.26375500  | H | 4.05934000  | -1.85450100 | 2.32487400  |
| H  | -1.27152100 | 1.59654800  | 2.97647700  | C | 3.45989800  | -4.00888700 | 0.62743700  |
| C  | 0.54449600  | 2.04292600  | 4.05020100  | H | 4.54746700  | -3.89304300 | 0.73848700  |
| H  | -0.09043700 | 2.59042900  | 4.76452200  | H | 3.27516900  | -4.46055000 | -0.35650200 |
| H  | 0.70580700  | 1.04344900  | 4.49254500  | H | 3.11858900  | -4.71551200 | 1.39659700  |
| C  | 1.89402500  | 2.76114100  | 3.96461500  | C | -2.26709000 | -1.81241500 | 0.44731100  |
| C  | 3.03277100  | 1.97551100  | 3.29628700  | C | -2.10894300 | -2.00542100 | 1.83398100  |
| C  | 3.37422600  | 2.37789600  | 1.86147900  | C | -3.22633200 | -1.81807000 | 2.64570700  |
| H  | 4.12036300  | 1.66549000  | 1.46942800  | H | -3.13552000 | -1.95212100 | 3.72264400  |
| H  | 3.86193600  | 3.36640300  | 1.86657900  | C | -4.45803100 | -1.47564500 | 2.10120700  |
| C  | 2.18741000  | 2.41985900  | 0.89351600  | H | -5.31881100 | -1.33281500 | 2.75308200  |
| H  | 1.52984000  | 3.26564200  | 1.14334300  | C | -4.59665100 | -1.34182800 | 0.72870200  |
| H  | 2.57389200  | 2.60820000  | -0.12219700 | H | -5.57156400 | -1.10423200 | 0.30478500  |
| C  | -0.10666000 | -1.05563500 | -0.54793300 | C | -3.50829900 | -1.51337800 | -0.13108500 |
| C  | -0.78402800 | -3.18642400 | -1.00158400 | C | -3.71529200 | -1.46046800 | -1.62809100 |
| H  | -1.47210000 | -4.02226600 | -1.00400200 | H | -2.73909400 | -1.29991800 | -2.10537200 |
| C  | 0.45309100  | -3.04219200 | -1.52132900 | C | -4.29121300 | -2.79247000 | -2.11264400 |
| H  | 1.09044400  | -3.72553300 | -2.06720700 | H | -5.27558500 | -2.98216600 | -1.65859900 |
| C  | 2.22986400  | -1.31724300 | -1.34757200 | H | -4.41919800 | -2.78315500 | -3.20344800 |
| C  | 3.13352000  | -1.72922300 | -0.35229100 | H | -3.64160900 | -3.64111200 | -1.85570200 |
| C  | 4.44263900  | -1.25254500 | -0.42874000 | C | -4.61229100 | -0.30588400 | -2.06071800 |
| H  | 5.16592000  | -1.54528900 | 0.33287900  | H | -5.65624400 | -0.45268100 | -1.74529400 |

|   |             |             |             |   |             |             |            |
|---|-------------|-------------|-------------|---|-------------|-------------|------------|
| H | -4.24642800 | 0.64737100  | -1.65940000 | C | -0.57585500 | -1.99088900 | 3.86619600 |
| H | -4.60702200 | -0.22358800 | -3.15526400 | H | -0.79772300 | -0.92141800 | 3.97665000 |
| C | -0.80283400 | -2.48270100 | 2.43895500  | H | 0.47149100  | -2.15267000 | 4.15775800 |
| H | 0.01987000  | -2.09766900 | 1.81772700  | H | -1.19831000 | -2.53910500 | 4.58783900 |
| C | -0.72180400 | -4.01074700 | 2.40891600  | H | 3.95057300  | 2.08464200  | 3.89310800 |
| H | -1.53524300 | -4.44961300 | 3.00504500  | H | 2.79096300  | 0.90141500  | 3.33003900 |
| H | 0.23317000  | -4.35403000 | 2.83417400  | H | 1.75929000  | 3.73416400  | 3.46093200 |
| H | -0.79760200 | -4.40842000 | 1.38870800  | H | 2.19367400  | 3.00819900  | 4.99389000 |

Complex **3bt**

E= -2056.60914873 a.u.

G= -2055.959966 a.u.

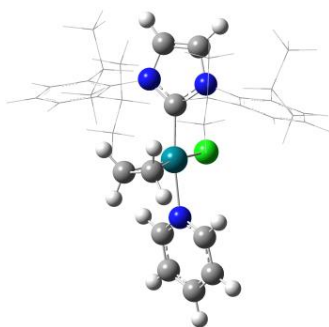

|    |             |             |             |   |             |             |             |
|----|-------------|-------------|-------------|---|-------------|-------------|-------------|
| Rh | 0.39057200  | 1.05871800  | -0.46699500 | C | 1.74063000  | -1.99964500 | 0.34605500  |
| Cl | 1.24337500  | 1.63209100  | 1.70537400  | C | 1.93834700  | -2.54886500 | -0.93490100 |
| N  | -1.59189800 | -0.87403300 | 0.84403200  | C | 3.24324800  | -2.86145200 | -1.31185100 |
| N  | 0.39224600  | -1.69759900 | 0.74691600  | H | 3.43003900  | -3.28588200 | -2.29734700 |
| C  | -1.05127700 | 1.43186500  | -1.95718500 | C | 4.30650600  | -2.65618600 | -0.44187700 |
| H  | -2.04218100 | 1.06848000  | -1.67922300 | H | 5.31964100  | -2.90747500 | -0.75314500 |
| C  | -0.07719100 | 0.56714000  | -2.48986700 | C | 4.07760000  | -2.15425300 | 0.82979500  |
| H  | -0.31457800 | -0.48544500 | -2.64911000 | H | 4.91469500  | -2.01952900 | 1.51338300  |
| C  | -0.34538800 | -0.61225400 | 0.34281800  | C | 2.79073200  | -1.81898600 | 1.25827200  |
| C  | -0.37590300 | -2.58277600 | 1.49362400  | C | 2.56858300  | -1.36299900 | 2.68409500  |
| H  | 0.04482000  | -3.49461000 | 1.89702800  | H | 1.59178300  | -0.86160200 | 2.73423100  |
| C  | -1.61971900 | -2.06570600 | 1.55734000  | C | 2.56112900  | -2.57195300 | 3.62262500  |
| H  | -2.52691100 | -2.41600700 | 2.03227600  | H | 3.53107400  | -3.09055600 | 3.59777600  |
| C  | -2.79164100 | -0.16903000 | 0.49863100  | H | 2.37741100  | -2.25376300 | 4.65781900  |
| C  | -3.56226900 | -0.67940900 | -0.55915100 | H | 1.78973700  | -3.30710100 | 3.35505900  |
| C  | -4.74004700 | -0.00424100 | -0.88183200 | C | 3.60976400  | -0.35038600 | 3.15116200  |
| H  | -5.36565300 | -0.37202200 | -1.69528300 | H | 4.60387500  | -0.80676700 | 3.26973800  |
| C  | -5.11791200 | 1.13809200  | -0.18843300 | H | 3.68007000  | 0.49083800  | 2.45242600  |
| H  | -6.03627200 | 1.65746700  | -0.45887600 | H | 3.31688600  | 0.05367400  | 4.12914700  |
| C  | -4.33175700 | 1.62010700  | 0.85047700  | C | 0.77955900  | -2.89271400 | -1.84770800 |
| H  | -4.64231800 | 2.51333500  | 1.39147300  | H | -0.04746700 | -2.20807200 | -1.61593800 |
| C  | -3.15266300 | 0.97268300  | 1.22374000  | C | 0.28659700  | -4.31402200 | -1.56795700 |
| C  | -2.33901400 | 1.44835600  | 2.40534000  | H | 1.08494600  | -5.04563400 | -1.76127200 |
| H  | -1.31800900 | 1.05409900  | 2.30627000  | H | -0.56653700 | -4.56384700 | -2.21609300 |
| C  | -2.21154400 | 2.96510700  | 2.47047600  | H | -0.03798400 | -4.43556200 | -0.52571900 |
| H  | -1.85553200 | 3.37191500  | 1.51433400  | C | 1.10133300  | -2.73212400 | -3.32982400 |
| H  | -1.48048200 | 3.24061600  | 3.24099300  | H | 1.56798900  | -1.76091800 | -3.54153800 |
| H  | -3.16391100 | 3.45416500  | 2.72391200  | H | 0.17890000  | -2.80432600 | -3.92322900 |
| C  | -2.94268700 | 0.89656300  | 3.69726300  | H | 1.77807300  | -3.52018000 | -3.69001500 |
| H  | -2.34440500 | 1.20391600  | 4.56541500  | H | -1.02932000 | 2.49849300  | -2.20067500 |
| H  | -2.98305900 | -0.20174200 | 3.68607300  | H | 0.69234000  | 0.95143600  | -3.16663500 |
| H  | -3.96854700 | 1.26812700  | 3.84147600  | N | 1.38998700  | 2.83088800  | -1.13341500 |
| C  | -3.15067800 | -1.91081000 | -1.34230800 | C | 2.52700800  | 2.73555800  | -1.83519200 |
| H  | -2.12181400 | -2.17348200 | -1.05189700 | C | 0.98803200  | 4.04326900  | -0.72798500 |
| C  | -3.14474000 | -1.66734600 | -2.85026200 | C | 3.29466000  | 3.84248300  | -2.16935700 |
| H  | -2.54309000 | -0.78918700 | -3.11965600 | H | 2.82411200  | 1.72586700  | -2.11771400 |
| H  | -2.72705600 | -2.54048400 | -3.37222300 | C | 1.69320900  | 5.20078800  | -1.02371100 |
| H  | -4.16006100 | -1.51177000 | -3.24210500 | H | 0.07657500  | 4.06167800  | -0.13213100 |
| C  | -4.04255500 | -3.10383200 | -0.99977700 | C | 2.86798000  | 5.09985400  | -1.75897600 |
| H  | -5.08663800 | -2.90809000 | -1.28412100 | H | 4.21318300  | 3.71214300  | -2.73624400 |
| H  | -4.02914300 | -3.32979800 | 0.07453200  | H | 1.32557900  | 6.16111800  | -0.67056300 |
| H  | -3.71068300 | -4.00188200 | -1.53930000 | H | 3.44687100  | 5.98845700  | -2.00399500 |

Complex **3ct**

E= -2056.60090097 a.u.

G= -2055.951951 a.u.

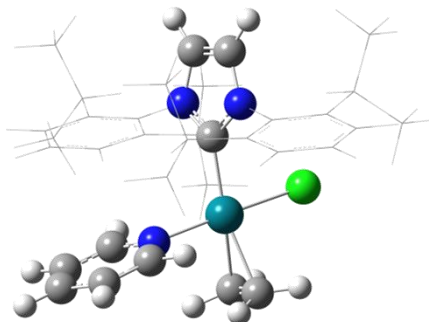

|    |             |             |             |   |             |             |             |
|----|-------------|-------------|-------------|---|-------------|-------------|-------------|
| Rh | 0.01031600  | -0.50066100 | -1.52548200 | C | -4.88254100 | 1.87489000  | -0.33675800 |
| Cl | -1.30429500 | -2.48481600 | -1.38405400 | H | -5.76501300 | 2.38682700  | -0.71765200 |
| N  | 0.52564600  | -0.77964700 | 1.48462000  | C | -4.92915500 | 0.51723300  | -0.07100000 |
| N  | -1.48281400 | -0.08203300 | 1.17039400  | H | -5.85140100 | -0.03579500 | -0.24481400 |
| C  | -0.31520300 | -0.32980000 | 0.50599100  | C | -3.81004800 | -0.16555600 | 0.41338300  |
| C  | -1.37582700 | -0.41270000 | 2.51822000  | C | -3.91649700 | -1.63801900 | 0.74414700  |
| H  | -2.20795100 | -0.28899700 | 3.19894500  | H | -2.89710300 | -2.03620800 | 0.84454000  |
| C  | -0.11608100 | -0.85293700 | 2.71602400  | C | -4.66438000 | -1.83221900 | 2.06461500  |
| H  | 0.39641600  | -1.20195900 | 3.60316700  | H | -5.69166200 | -1.44500800 | 1.99289000  |
| C  | 1.95312600  | -0.85275700 | 1.34687800  | H | -4.72580500 | -2.89929300 | 2.31749500  |
| C  | 2.69805000  | 0.27438200  | 1.73758600  | H | -4.17865200 | -1.31539100 | 2.90394900  |
| C  | 4.08756500  | 0.20369900  | 1.62634200  | C | -4.59906400 | -2.43532900 | -0.36317100 |
| H  | 4.69379700  | 1.05857800  | 1.92763800  | H | -5.66752400 | -2.18795700 | -0.44866200 |
| C  | 4.70645700  | -0.93947200 | 1.13752900  | H | -4.11149800 | -2.26237200 | -1.32909100 |
| H  | 5.79219300  | -0.97957300 | 1.05972800  | H | -4.52842000 | -3.50862500 | -0.14283700 |
| C  | 3.94381700  | -2.03565200 | 0.75438000  | C | -1.33429200 | 2.77495800  | 0.73050400  |
| H  | 4.43753600  | -2.93079600 | 0.37717400  | H | -0.44840700 | 2.17824500  | 0.45591000  |
| C  | 2.55026300  | -2.02043400 | 0.85323200  | C | -1.28614300 | 3.05115000  | 2.23690600  |
| C  | 1.73884800  | -3.23958100 | 0.48116500  | H | -2.16333600 | 3.64197800  | 2.53955900  |
| H  | 0.69066300  | -2.93540300 | 0.35306900  | H | -0.38531600 | 3.62665800  | 2.49858500  |
| C  | 2.17843000  | -3.84806400 | -0.84660000 | H | -1.28000600 | 2.12949600  | 2.83331700  |
| H  | 2.20190200  | -3.08574400 | -1.63864100 | C | -1.23491200 | 4.10323600  | -0.01362500 |
| H  | 1.46204800  | -4.62031800 | -1.15415000 | H | -1.39012100 | 3.99232000  | -1.09542600 |
| H  | 3.17151700  | -4.31876400 | -0.78197500 | H | -0.24021900 | 4.54355200  | 0.14402800  |
| C  | 1.80457700  | -4.27109900 | 1.60726300  | H | -1.97131300 | 4.83204700  | 0.35453400  |
| H  | 1.19423600  | -5.14906800 | 1.35757700  | N | 1.28815400  | 1.12322800  | -1.72304000 |
| H  | 1.43194100  | -3.85829500 | 2.55578700  | C | 0.85089600  | 2.34239200  | -2.08509700 |
| H  | 2.83757100  | -4.61290500 | 1.77436700  | C | 2.61682600  | 0.93905400  | -1.60459800 |
| C  | 2.04645400  | 1.52578100  | 2.29334200  | C | 1.70827900  | 3.40391500  | -2.33904700 |
| H  | 0.95837200  | 1.42305900  | 2.18675600  | H | -0.23053600 | 2.44532700  | -2.16787600 |
| C  | 2.44246600  | 2.78937300  | 1.53436700  | C | 3.53739700  | 1.94787500  | -1.84761500 |
| H  | 2.10170400  | 2.75419200  | 0.49076900  | H | 2.92689400  | -0.06041200 | -1.29944700 |
| H  | 1.98635100  | 3.67092600  | 2.00793600  | C | 3.07986200  | 3.20594400  | -2.22365100 |
| H  | 3.53003500  | 2.94965600  | 1.52943900  | H | 1.29448600  | 4.36870300  | -2.62477000 |
| C  | 2.34078200  | 1.67513300  | 3.78561200  | H | 4.59851000  | 1.73874900  | -1.73083200 |
| H  | 3.41115400  | 1.85005100  | 3.96688700  | H | 3.77832800  | 4.01750600  | -2.41792900 |
| H  | 2.05144900  | 0.77624100  | 4.34638900  | C | 0.73143100  | -1.20904700 | -3.46095600 |
| H  | 1.78654800  | 2.52816800  | 4.20185400  | H | 1.73102100  | -0.80488200 | -3.64474800 |
| C  | -2.63938200 | 0.57537900  | 0.62124900  | H | 0.65485000  | -2.29649100 | -3.43472000 |
| C  | -2.56926100 | 1.96365600  | 0.38361300  | C | -0.39765400 | -0.42839200 | -3.66004400 |
| C  | -3.71273000 | 2.59034700  | -0.10715000 | H | -1.37933600 | -0.88592500 | -3.78469800 |
| H  | -3.69777000 | 3.66066000  | -0.30381000 | H | -0.31037200 | 0.60397800  | -4.00663200 |

Complex 6t

E= -2226.17065022 a.u.

G= -2225.489352 a.u.

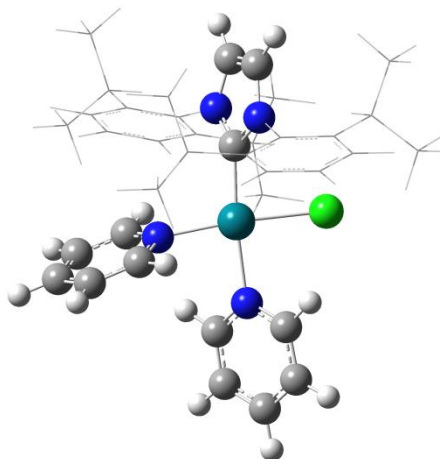

|    |             |             |             |   |             |             |             |
|----|-------------|-------------|-------------|---|-------------|-------------|-------------|
| Rh | -0.09806700 | 1.06348700  | 0.12938500  | C | -2.40522300 | -2.76784600 | -2.27618500 |
| Cl | 1.38627200  | 1.62247100  | 1.91533000  | H | -2.23621800 | -1.69824800 | -2.45574300 |
| N  | -0.53593800 | 3.16876500  | -0.02723200 | H | -1.94292400 | -3.32453100 | -3.10367300 |
| N  | -0.23843300 | -1.81641300 | 1.02462500  | H | -3.48820600 | -2.95179800 | -2.32342400 |
| N  | 1.70843100  | -1.37418000 | 0.22479000  | C | -1.87983200 | -4.73271800 | -0.80367600 |
| C  | 0.49160700  | 4.03350100  | -0.08236100 | H | -2.92295400 | -5.08017200 | -0.82608900 |
| H  | 1.48115700  | 3.58507900  | -0.02415700 | H | -1.43679500 | -5.07584200 | 0.14075300  |
| C  | 0.30990500  | 5.40602100  | -0.18141100 | H | -1.34498100 | -5.22505400 | -1.62818600 |
| H  | 1.17838400  | 6.05893700  | -0.22469100 | C | 2.79359900  | -0.81139800 | -0.52933600 |
| C  | -0.98170200 | 5.91697200  | -0.21282500 | C | 2.67730200  | -0.77206700 | -1.93278700 |
| H  | -1.15437900 | 6.98937800  | -0.28455600 | C | 3.76157100  | -0.28329700 | -2.65845500 |
| C  | -2.04827000 | 5.02875400  | -0.14314500 | H | 3.70604500  | -0.23715900 | -3.74470600 |
| H  | -3.07884400 | 5.37584000  | -0.15250600 | C | 4.92274900  | 0.13520900  | -2.01899400 |
| C  | -1.77966400 | 3.67050000  | -0.05351800 | H | 5.76133400  | 0.50833000  | -2.60550000 |
| H  | -2.58962900 | 2.94324100  | 0.00436300  | C | 5.01715700  | 0.06692700  | -0.63917000 |
| C  | 0.46351700  | -0.81752000 | 0.39646400  | H | 5.93304200  | 0.38896900  | -0.14459700 |
| C  | 1.77192400  | -2.65486300 | 0.76432700  | C | 3.95682600  | -0.40541500 | 0.13942500  |
| H  | 2.68080300  | -3.24044500 | 0.72236000  | C | 4.12483500  | -0.50552600 | 1.64126300  |
| C  | 0.55314700  | -2.93227200 | 1.26961000  | H | 3.12950800  | -0.64678900 | 2.08601100  |
| H  | 0.16233000  | -3.80520500 | 1.77618200  | C | 5.01196500  | -1.69983000 | 1.99892200  |
| C  | -1.65835100 | -1.82477900 | 1.19680200  | H | 6.02232900  | -1.57349600 | 1.58209800  |
| C  | -2.42749600 | -2.52048600 | 0.24811100  | H | 5.11018100  | -1.79528800 | 3.08886400  |
| C  | -3.80926800 | -2.56681700 | 0.44239700  | H | 4.61872300  | -2.64961700 | 1.61161800  |
| H  | -4.43372200 | -3.10830600 | -0.26901400 | C | 4.70361900  | 0.76836500  | 2.25138100  |
| C  | -4.39849600 | -1.92493700 | 1.52434200  | H | 5.75020600  | 0.92961100  | 1.95365100  |
| H  | -5.47821200 | -1.97139200 | 1.66173100  | H | 4.10727600  | 1.64248000  | 1.96578500  |
| C  | -3.61384200 | -1.22445200 | 2.43314700  | H | 4.68555500  | 0.69306700  | 3.34697700  |
| H  | -4.08541400 | -0.72388200 | 3.27868200  | C | 1.45170600  | -1.31542300 | -2.64467200 |
| C  | -2.22541300 | -1.16092300 | 2.29352300  | H | 0.56815600  | -1.03442300 | -2.04918100 |
| C  | -1.37856600 | -0.43704300 | 3.31604300  | C | 1.51847700  | -2.84339800 | -2.72734400 |
| H  | -0.37063100 | -0.29891700 | 2.89993400  | H | 2.40325200  | -3.15334200 | -3.30362500 |
| C  | -1.90563100 | 0.96082900  | 3.62064500  | H | 0.62929800  | -3.24632500 | -3.23541900 |
| H  | -1.97547600 | 1.55519900  | 2.69750400  | H | 1.58231900  | -3.31217000 | -1.73589400 |
| H  | -1.20617700 | 1.48161900  | 4.28677200  | C | 1.25092100  | -0.74410000 | -4.04366000 |
| H  | -2.89006700 | 0.94069800  | 4.11218600  | H | 1.31951800  | 0.35247200  | -4.05437300 |
| C  | -1.26434400 | -1.28246100 | 4.58345800  | H | 0.25983500  | -1.03053500 | -4.42409500 |
| H  | -0.61705300 | -0.78654800 | 5.31874600  | H | 1.99371500  | -1.13189400 | -4.75609900 |
| H  | -0.83509000 | -2.27100500 | 4.36527700  | N | -1.57085500 | 0.77221700  | -1.31017700 |
| H  | -2.24867000 | -1.44007800 | 5.05021000  | C | -1.36049700 | 1.11868400  | -2.59542500 |
| C  | -1.80045200 | -3.21332000 | -0.94694000 | C | -2.83851500 | 0.49887800  | -0.93993500 |
| H  | -0.73668200 | -2.94055400 | -0.97927400 | C | -2.38053600 | 1.20676500  | -3.53204600 |

|   |             |            |             |
|---|-------------|------------|-------------|
| H | -0.32707700 | 1.34212300 | -2.85406200 |
| C | -3.91261500 | 0.57088500 | -1.81579600 |
| H | -2.97576200 | 0.22377500 | 0.10494100  |
| C | -3.68601800 | 0.93012500 | -3.13984200 |

|   |             |            |             |
|---|-------------|------------|-------------|
| H | -2.14283000 | 1.49195800 | -4.55455300 |
| H | -4.91071200 | 0.33726300 | -1.45082800 |
| H | -4.50706700 | 0.99218700 | -3.85140900 |

**Complex 4at**

E= -2175.65340400 a.u.

G= -2174.903430 a.u.

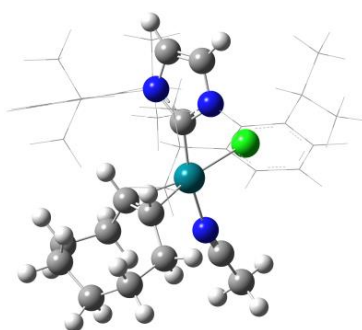

|    |             |             |             |
|----|-------------|-------------|-------------|
| Rh | 0.07933900  | 1.14598100  | -0.18268800 |
| Cl | -0.83478500 | 0.88351100  | -2.29759100 |
| O  | 1.55251600  | 1.26660700  | 1.14705000  |
| N  | 0.18530700  | 3.30908100  | -0.42705300 |
| N  | 0.99043500  | -1.71645200 | 0.11495300  |
| C  | 1.02523800  | 3.99835000  | 0.36019100  |
| H  | 1.64921900  | 3.38954300  | 1.01289900  |
| C  | 1.10107400  | 5.38352300  | 0.32832000  |
| H  | 1.80150900  | 5.89778700  | 0.98185400  |
| C  | 0.27406400  | 6.08390900  | -0.54066600 |
| H  | 0.30852400  | 7.17105700  | -0.58470800 |
| C  | -0.59668000 | 5.36948500  | -1.35430500 |
| H  | -1.26316200 | 5.87072100  | -2.05183800 |
| C  | -0.60927400 | 3.98481400  | -1.26931400 |
| H  | -1.25968300 | 3.37566500  | -1.89541300 |
| C  | -0.03623600 | -0.82781600 | 0.09997100  |
| C  | 0.53079000  | -2.99861800 | 0.38118600  |
| H  | 1.20787200  | -3.84157300 | 0.41962700  |
| C  | 2.37878200  | -1.41374600 | -0.11310100 |
| C  | 2.83837600  | -1.34115500 | -1.43450100 |
| C  | 4.19779700  | -1.08692000 | -1.62484500 |
| H  | 4.59237700  | -1.02735800 | -2.63853000 |
| C  | 5.05042700  | -0.91425000 | -0.54389100 |
| H  | 6.10838400  | -0.71884800 | -0.71398700 |
| C  | 4.56117200  | -0.98823100 | 0.75418400  |
| H  | 5.23969700  | -0.84473200 | 1.59417900  |
| C  | 3.21098300  | -1.23234600 | 1.00105600  |
| C  | 2.69431700  | -1.33850300 | 2.41981500  |
| H  | 1.60464500  | -1.18612800 | 2.39605900  |
| C  | 3.27399700  | -0.27294100 | 3.34485500  |
| H  | 2.76530500  | -0.30925900 | 4.31744100  |
| H  | 3.14046400  | 0.72977300  | 2.92353900  |
| H  | 4.34471300  | -0.43497900 | 3.53628200  |
| C  | 2.98169100  | -2.73145800 | 2.98352300  |
| H  | 4.06526500  | -2.91737200 | 3.01667300  |
| H  | 2.52940100  | -3.52666100 | 2.37599100  |
| H  | 2.59209000  | -2.82605600 | 4.00638500  |
| C  | 1.93107400  | -1.59337000 | -2.61972400 |
| H  | 0.89057500  | -1.44113600 | -2.29863000 |
| C  | 2.17695600  | -0.62274500 | -3.76925500 |

|   |             |             |             |
|---|-------------|-------------|-------------|
| H | 3.15438600  | -0.78522300 | -4.24627500 |
| H | 2.12384600  | 0.41852800  | -3.42717400 |
| H | 1.40836200  | -0.75857800 | -4.54132500 |
| C | 2.07793200  | -3.04141800 | -3.08796200 |
| H | 1.40833200  | -3.24637100 | -3.93423100 |
| H | 1.83954800  | -3.75381100 | -2.28580100 |
| H | 3.10873600  | -3.24221000 | -3.41534400 |
| O | 0.37276800  | 1.45246100  | 1.78332000  |
| N | -1.14347500 | -1.57327500 | 0.35840900  |
| C | -0.80667700 | -2.90715000 | 0.54443900  |
| H | -1.55858600 | -3.64949900 | 0.77712500  |
| C | -2.49379900 | -1.08800200 | 0.47599200  |
| C | -3.37125100 | -1.27849200 | -0.60277100 |
| C | -4.68689200 | -0.84440800 | -0.43981600 |
| H | -5.39618000 | -0.97573000 | -1.25605200 |
| C | -5.10479000 | -0.24870500 | 0.74202500  |
| H | -6.13647000 | 0.08440100  | 0.84623300  |
| C | -4.21470700 | -0.08160900 | 1.79373700  |
| H | -4.55634500 | 0.37629000  | 2.72125600  |
| C | -2.88815500 | -0.50161900 | 1.68800600  |
| C | -1.95420100 | -0.39485700 | 2.87410700  |
| H | -0.91954100 | -0.45199900 | 2.51052500  |
| C | -2.07358800 | 0.94017600  | 3.60001300  |
| H | -1.28845000 | 1.01931400  | 4.36314100  |
| H | -1.94427900 | 1.77834000  | 2.90352900  |
| H | -3.04138700 | 1.05133800  | 4.11023400  |
| C | -2.19869100 | -1.56260800 | 3.83016700  |
| H | -3.22626600 | -1.53861100 | 4.22243700  |
| H | -2.05488800 | -2.53214000 | 3.33278900  |
| H | -1.50968400 | -1.51495500 | 4.68455400  |
| C | -2.95324100 | -1.97186100 | -1.88241400 |
| H | -1.85510300 | -1.94535200 | -1.94061700 |
| C | -3.48905000 | -1.27788600 | -3.13104200 |
| H | -4.57977800 | -1.38455000 | -3.22087300 |
| H | -3.23851500 | -0.21064600 | -3.13011300 |
| H | -3.04532700 | -1.73067700 | -4.02759800 |
| C | -3.40187200 | -3.43434500 | -1.86437800 |
| H | -3.09490800 | -3.94540400 | -2.78699400 |
| H | -2.97813100 | -3.98795600 | -1.01601000 |
| H | -4.49697300 | -3.50299700 | -1.78998400 |

Complex **4bt**

E= -1941.16549302 a.u.

G= -1940,559443 a.u.

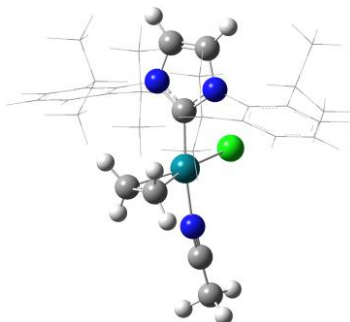

|    |             |             |             |   |             |             |             |
|----|-------------|-------------|-------------|---|-------------|-------------|-------------|
| Rh | 0.01419900  | 1.17661500  | -0.97855700 | H | -2.70271500 | -3.92602300 | 1.46948200  |
| Cl | 0.76126400  | 2.58903800  | 0.81353700  | H | -2.21520700 | -4.96977700 | 0.11543700  |
| N  | -1.10349900 | -0.75021300 | 1.09802500  | C | 2.38359100  | -0.95102900 | 0.43645900  |
| N  | 1.03344400  | -0.93538400 | 0.93552000  | C | 2.67769000  | -1.81800500 | -0.63268400 |
| C  | -1.47914000 | 0.51258200  | -2.32605000 | C | 3.99327300  | -1.85905300 | -1.09116800 |
| H  | -2.24853900 | -0.08101900 | -1.83013800 | H | 4.25250000  | -2.51742100 | -1.91907100 |
| C  | -0.25069900 | -0.05293400 | -2.70559200 | C | 4.98145800  | -1.08446800 | -0.49781700 |
| H  | -0.05808800 | -1.10970200 | -2.52028500 | H | 6.00410900  | -1.13023900 | -0.86977600 |
| C  | -0.04184400 | -0.31044600 | 0.35634600  | C | 4.67171600  | -0.26996700 | 0.57973700  |
| C  | 0.64157800  | -1.71077700 | 2.01971800  | H | 5.45835800  | 0.31503200  | 1.05441900  |
| H  | 1.36075900  | -2.27400700 | 2.59965000  | C | 3.36932400  | -0.18651300 | 1.07849900  |
| C  | -0.69763300 | -1.59187700 | 2.12537200  | C | 3.09324900  | 0.63650700  | 2.31887900  |
| H  | -1.40963300 | -2.01684900 | 2.82065000  | H | 2.01244900  | 0.82708500  | 2.36994600  |
| C  | -2.48646100 | -0.58569400 | 0.75231300  | C | 3.52689900  | -0.13607900 | 3.56651900  |
| C  | -3.09781700 | -1.61934700 | 0.02197400  | H | 4.60922400  | -0.33310900 | 3.54889200  |
| C  | -4.44557500 | -1.46833000 | -0.30447700 | H | 3.30629700  | 0.44468100  | 4.47245500  |
| H  | -4.95356100 | -2.25096300 | -0.86793600 | H | 3.01899800  | -1.10622000 | 3.65791200  |
| C  | -5.14569900 | -0.32938400 | 0.07212800  | C | 3.77825900  | 1.99946800  | 2.28823200  |
| H  | -6.19629400 | -0.22571500 | -0.19565000 | H | 4.87189700  | 1.91342200  | 2.37143600  |
| C  | -4.51312200 | 0.67385200  | 0.79331400  | H | 3.52834500  | 2.54544800  | 1.37132400  |
| H  | -5.07480600 | 1.55879500  | 1.09123000  | H | 3.43364900  | 2.60348200  | 3.13808500  |
| C  | -3.16853000 | 0.56847000  | 1.15542500  | C | 1.64465400  | -2.76412400 | -1.21095200 |
| C  | -2.51506300 | 1.63967600  | 1.99798000  | H | 0.65164800  | -2.31328700 | -1.07092500 |
| H  | -1.42730700 | 1.48716300  | 1.97737900  | C | 1.65797400  | -4.09010700 | -0.44703000 |
| C  | -2.76120000 | 3.04192100  | 1.45167800  | H | 2.64329600  | -4.57199900 | -0.52998800 |
| H  | -2.43138800 | 3.11592100  | 0.40675100  | H | 0.90742700  | -4.78308900 | -0.85485300 |
| H  | -2.17900800 | 3.77053600  | 2.03036100  | H | 1.43973600  | -3.94852200 | 0.61992700  |
| H  | -3.82070700 | 3.33263500  | 1.51235300  | C | 1.81979700  | -3.01826700 | -2.70481400 |
| C  | -2.98665000 | 1.51841800  | 3.44653600  | H | 1.92973500  | -2.08103300 | -3.26607800 |
| H  | -2.48610200 | 2.26542000  | 4.07678600  | H | 0.94300300  | -3.55108000 | -3.09893100 |
| H  | -2.76630700 | 0.52328900  | 3.85864300  | H | 2.69708500  | -3.64632900 | -2.91495700 |
| H  | -4.07205400 | 1.68005600  | 3.52826100  | C | 0.39722500  | 3.85488700  | -2.72661100 |
| C  | -2.34648800 | -2.86457800 | -0.40931100 | C | 0.63722200  | 5.12378100  | -3.38341200 |
| H  | -1.27855400 | -2.71497200 | -0.19183100 | H | 1.36826700  | 5.00660600  | -4.19095000 |
| C  | -2.46365700 | -3.13121000 | -1.90866900 | H | -0.29262800 | 5.52081800  | -3.80530500 |
| H  | -2.14334600 | -2.26548300 | -2.50351100 | H | 1.02913900  | 5.84590500  | -2.65851600 |
| H  | -1.83615900 | -3.98913300 | -2.19030200 | N | 0.21853700  | 2.85153700  | -2.17885100 |
| H  | -3.49492900 | -3.37642700 | -2.19984600 | H | -1.86902100 | 1.38909700  | -2.84872500 |
| C  | -2.80658100 | -4.08454900 | 0.38806200  | H | 0.32730300  | 0.36932700  | -3.53118600 |
| H  | -3.86318100 | -4.31215400 | 0.18593500  |   |             |             |             |

Complex 7t

E= -1995.28814117 a.u.

G= -1994.691978 a.u.

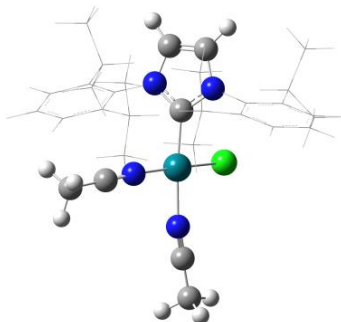

|    |             |             |             |   |             |             |             |
|----|-------------|-------------|-------------|---|-------------|-------------|-------------|
| Rh | 0.01644400  | 1.19808000  | 0.78931900  | C | -3.64526600 | -1.86095000 | 1.78594300  |
| Cl | -1.39482200 | 2.47786500  | -0.64295000 | H | -3.65197000 | -2.41025500 | 2.72697900  |
| N  | 0.79305700  | -0.69196100 | -1.42531500 | C | -4.82510300 | -1.30459200 | 1.30941100  |
| N  | -1.28002000 | -0.95529600 | -0.90929900 | H | -5.74636200 | -1.41195900 | 1.88060800  |
| C  | -0.15734700 | -0.27008000 | -0.53439100 | C | -4.83327000 | -0.61728500 | 0.10541600  |
| C  | -1.03386600 | -1.75641900 | -2.01902400 | H | -5.76442800 | -0.18668500 | -0.26119400 |
| H  | -1.81067000 | -2.37115500 | -2.45409800 | C | -3.66732600 | -0.45881500 | -0.64689700 |
| C  | 0.26376500  | -1.58593800 | -2.34886300 | C | -3.71563900 | 0.27195500  | -1.97188600 |
| H  | 0.86918000  | -2.01182300 | -3.13854800 | H | -2.68569600 | 0.54669100  | -2.24201000 |
| C  | 2.19574100  | -0.47209200 | -1.23301100 | C | -4.30220300 | -0.63021600 | -3.05927400 |
| C  | 2.94323000  | -1.50552900 | -0.64350200 | H | -5.33832800 | -0.90926600 | -2.81615100 |
| C  | 4.30163200  | -1.27300900 | -0.41893700 | H | -4.31439400 | -0.11068000 | -4.02715600 |
| H  | 4.91589300  | -2.05918100 | 0.02282800  | H | -3.73477500 | -1.56302200 | -3.18524500 |
| C  | 4.88191700  | -0.05626000 | -0.75404900 | C | -4.50690200 | 1.57394900  | -1.89105400 |
| H  | 5.94328500  | 0.10866300  | -0.57138600 | H | -5.58137000 | 1.39523400  | -1.73739200 |
| C  | 4.11590600  | 0.94525800  | -1.33652100 | H | -4.12735400 | 2.20755800  | -1.08128500 |
| H  | 4.58226700  | 1.89233300  | -1.60605500 | H | -4.40096700 | 2.12911200  | -2.83268700 |
| C  | 2.75599000  | 0.76124200  | -1.59037000 | C | -1.20662500 | -2.45197400 | 1.56036600  |
| C  | 1.94844400  | 1.83567300  | -2.28273800 | H | -0.33116400 | -1.97245600 | 1.09916900  |
| H  | 0.88300900  | 1.63603300  | -2.10907200 | C | -1.23584100 | -3.91486800 | 1.11461400  |
| C  | 2.21528600  | 3.22943900  | -1.72702000 | H | -2.09249100 | -4.44030600 | 1.56214000  |
| H  | 2.06677800  | 3.24562300  | -0.63845000 | H | -0.31923300 | -4.43854800 | 1.42469500  |
| H  | 1.50384900  | 3.94074700  | -2.16558800 | H | -1.32420100 | -4.00290900 | 0.02269500  |
| H  | 3.23113100  | 3.58539400  | -1.95630700 | C | -1.00746600 | -2.34880500 | 3.06848900  |
| C  | 2.20661900  | 1.77781600  | -3.78827100 | H | -1.05329700 | -1.30452600 | 3.40318800  |
| H  | 1.60153200  | 2.53004400  | -4.31168400 | H | -0.02310500 | -2.75672000 | 3.34288400  |
| H  | 1.95277800  | 0.79083100  | -4.20109700 | H | -1.75943700 | -2.92391800 | 3.62787100  |
| H  | 3.26508600  | 1.97423300  | -4.01734200 | C | 2.26675100  | -0.06457900 | 2.55815500  |
| C  | 2.33735900  | -2.85131600 | -0.28529100 | C | -0.06387500 | 3.87680700  | 2.56170000  |
| H  | 1.24715100  | -2.79142700 | -0.41642300 | C | 3.39563000  | -0.51864800 | 3.34602500  |
| C  | 2.57492800  | -3.24831200 | 1.16860400  | H | 4.23737400  | -0.77059600 | 2.68789900  |
| H  | 2.10177800  | -2.53027300 | 1.85234600  | H | 3.72130200  | 0.26722000  | 4.03774000  |
| H  | 2.13765500  | -4.23744200 | 1.36585600  | H | 3.13415800  | -1.40864000 | 3.93260600  |
| H  | 3.64490100  | -3.31097900 | 1.41426100  | C | -0.23296700 | 5.14969100  | 3.23296500  |
| C  | 2.85576900  | -3.93715300 | -1.22831600 | H | -0.70750400 | 5.01054500  | 4.21094400  |
| H  | 3.93809600  | -4.08655900 | -1.10411500 | H | 0.73482600  | 5.64230000  | 3.37975500  |
| H  | 2.67941600  | -3.67576100 | -2.28009600 | H | -0.86947300 | 5.80384900  | 2.62660700  |
| H  | 2.35971600  | -4.89660700 | -1.02712300 | N | 1.37709500  | 0.31051100  | 1.90917400  |
| C  | -2.49166400 | -1.03078700 | -0.14169800 | N | 0.05034900  | 2.86658400  | 2.00826300  |
| C  | -2.45465900 | -1.74268100 | 1.07117000  |   |             |             |             |

Complex **12at**

E= -3013.80396749 a.u.

G= -3012.946705 a.u.

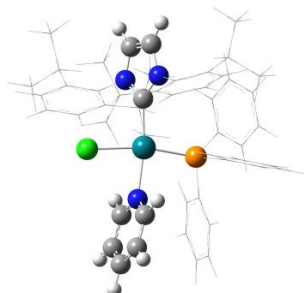

|    |             |             |             |   |             |             |             |
|----|-------------|-------------|-------------|---|-------------|-------------|-------------|
| Rh | 0.14725400  | -0.65798800 | -0.73090200 | C | -1.09595700 | 1.01019400  | 4.18256400  |
| Cl | 2.00122300  | -1.44323000 | -2.05578100 | H | -0.28862500 | 1.55193800  | 4.67616300  |
| P  | -1.82247700 | -0.27583800 | 0.33956700  | C | -2.21833300 | 0.60816000  | 4.89846900  |
| C  | 1.35768300  | 0.53557800  | 0.33628600  | H | -2.30334700 | 0.83600400  | 5.95985000  |
| N  | 2.37472700  | 0.11774000  | 1.16992400  | C | -3.22972900 | -0.09650200 | 4.25095800  |
| N  | 1.42999700  | 1.91287500  | 0.42252300  | H | -4.10893600 | -0.42182100 | 4.80535800  |
| C  | 3.00280400  | 1.19527100  | 1.78362400  | C | -3.12495500 | -0.38681100 | 2.89468900  |
| H  | 3.80345000  | 1.04646700  | 2.49571000  | H | -3.92242300 | -0.94652300 | 2.40616200  |
| C  | 2.42703900  | 2.31505200  | 1.30927800  | C | -2.93984200 | -1.73271300 | 0.12669500  |
| H  | 2.62289700  | 3.36201200  | 1.50113100  | C | -3.93348900 | -1.77570200 | -0.85375900 |
| C  | 2.97192200  | -1.19731800 | 1.21456500  | H | -4.14247800 | -0.89163500 | -1.45678700 |
| C  | 2.37986300  | -2.20103300 | 1.99338300  | C | -4.65970900 | -2.94296400 | -1.07871300 |
| C  | 2.99639000  | -3.45113400 | 2.02552400  | H | -5.42437300 | -2.95927000 | -1.85431300 |
| H  | 2.55567800  | -4.25206100 | 2.61724900  | C | -4.41532900 | -4.07936200 | -0.31560000 |
| C  | 4.17180000  | -3.68430800 | 1.32425400  | H | -4.98815000 | -4.98922000 | -0.48844700 |
| C  | 4.75097600  | -2.66751400 | 0.58155700  | C | -3.43276500 | -4.04605600 | 0.67091400  |
| H  | 5.67125900  | -2.86127500 | 0.03208500  | H | -3.23215900 | -4.92961200 | 1.27559700  |
| C  | 4.16392500  | -1.40430700 | 0.49767500  | C | -2.69486300 | -2.88697200 | 0.87954200  |
| C  | 1.16052800  | -1.90955900 | 2.83538900  | H | -1.91377800 | -2.87624800 | 1.64086500  |
| H  | 0.52643500  | -1.21744200 | 2.26282300  | N | -0.89604200 | -1.99828000 | -2.03301900 |
| C  | 4.83931600  | -0.32424200 | -0.32665500 | C | -0.77973600 | -3.31776100 | -1.83561800 |
| H  | 4.09252500  | 0.45123300  | -0.54867900 | C | -1.49044000 | -1.56999800 | -3.15353200 |
| C  | 0.79699700  | 2.87334700  | -0.44429600 | C | -1.28097900 | -4.25231600 | -2.72965300 |
| C  | -0.07900300 | 3.82774200  | 0.09947400  | H | -0.25056000 | -3.61415900 | -0.93080700 |
| C  | -0.61092300 | 4.79129500  | -0.76139400 | C | -2.01148500 | -2.43659500 | -4.10351900 |
| H  | -1.30116800 | 5.53570400  | -0.36438400 | H | -1.54212200 | -0.48878000 | -3.27872900 |
| C  | -0.28063400 | 4.81486400  | -2.10576900 | C | -1.91277200 | -3.80504300 | -3.88325400 |
| C  | 0.61827900  | 3.88564500  | -2.61344500 | H | -1.16773800 | -5.31306000 | -2.51973800 |
| H  | 0.90604900  | 3.93549300  | -3.66243500 | H | -2.48178600 | -2.03728000 | -4.99892700 |
| C  | 1.19490100  | 2.91207300  | -1.79743800 | H | -2.31415300 | -4.51359000 | -4.60578900 |
| C  | -0.41660100 | 3.91724900  | 1.57361400  | H | 4.64230400  | -4.66592400 | 1.36305400  |
| H  | 0.01542500  | 3.04663500  | 2.08320200  | H | -0.70915100 | 5.57300400  | -2.76062300 |
| C  | 2.30782700  | 2.04123800  | -2.34013900 | C | -1.91993500 | 3.90016100  | 1.83722400  |
| H  | 2.32738200  | 1.09694400  | -1.78578000 | H | -2.39555900 | 3.00424000  | 1.41937100  |
| C  | -2.87541000 | 1.07870600  | -0.34972900 | H | -2.11513200 | 3.91357900  | 2.91856100  |
| C  | -4.12904300 | 1.41064500  | 0.17906900  | H | -2.41993100 | 4.77641900  | 1.40014300  |
| H  | -4.50789800 | 0.88221700  | 1.05416100  | C | 0.21344500  | 5.16750900  | 2.19088300  |
| C  | -4.89246300 | 2.41992500  | -0.39332400 | H | -0.21584900 | 6.08207900  | 1.75784000  |
| H  | -5.86298400 | 2.67249800  | 0.03156400  | H | 0.03234000  | 5.19570600  | 3.27406600  |
| C  | -4.41703500 | 3.10716100  | -1.50925200 | H | 1.29867600  | 5.20801300  | 2.02478100  |
| H  | -5.01705900 | 3.89752000  | -1.95822200 | C | 1.57786500  | -1.23253800 | 4.14176600  |
| C  | -3.17676700 | 2.78266200  | -2.04534000 | H | 0.69870500  | -1.02353300 | 4.76766500  |
| H  | -2.79399700 | 3.32069000  | -2.91134400 | H | 2.25719900  | -1.88623200 | 4.70916500  |
| C  | -2.40624700 | 1.77750500  | -1.46337500 | H | 2.09627100  | -0.27974800 | 3.96416900  |
| H  | -1.41268400 | 1.53910700  | -1.85479100 | C | 0.31047000  | -3.13315700 | 3.14694400  |
| C  | -2.00182300 | 0.01541400  | 2.16046200  | H | -0.63304100 | -2.81175500 | 3.61423000  |
| C  | -0.98898700 | 0.70407700  | 2.82932000  | H | 0.07431900  | -3.70493600 | 2.23831400  |
| H  | -0.09497700 | 0.99423000  | 2.27965300  | H | 0.80405200  | -3.81287200 | 3.85708000  |



|   |            |            |             |
|---|------------|------------|-------------|
| C | 3.64951100 | 2.74825900 | -2.13079700 |
| H | 4.47390200 | 2.11567300 | -2.49160200 |
| H | 3.68343200 | 3.69944500 | -2.68376600 |
| H | 3.83536300 | 2.96815200 | -1.06853100 |
| C | 2.13010200 | 1.64386400 | -3.79914500 |
| H | 2.26017300 | 2.49101100 | -4.48942100 |
| H | 2.87864400 | 0.88367800 | -4.05709100 |
| H | 1.14218000 | 1.19372600 | -3.96977500 |

|   |            |             |             |
|---|------------|-------------|-------------|
| C | 5.36511600 | -0.82773000 | -1.66928300 |
| H | 5.71905400 | 0.02475200  | -2.26733600 |
| H | 6.22237000 | -1.50565300 | -1.54729100 |
| H | 4.57855400 | -1.34252500 | -2.23151100 |
| C | 5.99116200 | 0.32002700  | 0.44894600  |
| H | 6.77977900 | -0.42027500 | 0.64919300  |
| H | 6.43783500 | 1.13524200  | -0.13843300 |
| H | 5.67694400 | 0.73567400  | 1.41448000  |

Complex **12bt**

E= -3013.79540418 a.u.

G= -3012.943425 a.u.

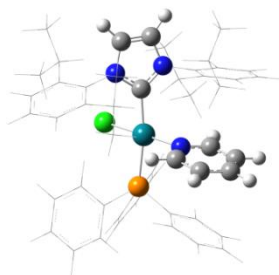

|    |             |             |             |
|----|-------------|-------------|-------------|
| Cl | 0.28608900  | 1.66227000  | 1.91625400  |
| C  | -3.95973500 | 1.21398100  | 0.40505900  |
| C  | -4.09341300 | -0.05336800 | 0.84447700  |
| H  | -4.68005300 | 2.01228800  | 0.28597400  |
| H  | -4.95002000 | -0.60716800 | 1.20677300  |
| C  | -1.89469200 | 0.24518700  | 0.29115600  |
| N  | -2.83147100 | -0.63319400 | 0.76360600  |
| N  | -2.62173100 | 1.38757600  | 0.07188000  |
| Rh | 0.14112900  | 0.01206200  | 0.18132500  |
| N  | 0.12434400  | -1.55787000 | -1.19059900 |
| C  | 0.21913900  | -1.34820700 | -2.51613800 |
| C  | 0.19698300  | -2.82971200 | -0.75497400 |
| C  | 0.38149400  | -2.37297500 | -3.43669800 |
| H  | 0.18711900  | -0.30610700 | -2.82582300 |
| C  | 0.37754100  | -3.90752700 | -1.60993000 |
| H  | 0.11706300  | -2.96356900 | 0.32383600  |
| C  | 0.47133400  | -3.68175400 | -2.97826300 |
| H  | 0.45271600  | -2.13273900 | -4.49573600 |
| H  | 0.44201900  | -4.90961900 | -1.19199500 |
| H  | 0.61480300  | -4.50757000 | -3.67233700 |
| P  | 2.47526600  | 0.09611100  | 0.10053700  |
| C  | -2.11815400 | 2.61128100  | -0.48958600 |
| C  | -1.98649000 | 3.74048500  | 0.33261000  |
| C  | -1.82634400 | 2.64012500  | -1.86557900 |
| C  | -1.50526300 | 4.91187400  | -0.25740800 |
| C  | -1.33955900 | 3.83243100  | -2.40014600 |
| C  | -1.17383300 | 4.95785400  | -1.60221400 |
| H  | -1.38488600 | 5.80328600  | 0.35633800  |
| H  | -1.09190500 | 3.88795200  | -3.45881400 |
| H  | -0.79462700 | 5.88196200  | -2.03779700 |
| C  | -2.61792400 | -2.02964600 | 1.00888300  |
| C  | -3.11706600 | -2.94078800 | 0.06723300  |
| C  | -1.95426000 | -2.43320200 | 2.18261300  |
| C  | -2.94521900 | -4.30352400 | 0.32729100  |
| C  | -1.80739000 | -3.80472500 | 2.39016800  |
| C  | -2.29967700 | -4.73184000 | 1.47624700  |
| H  | -3.32467600 | -5.03548700 | -0.38640900 |
| H  | -1.29833300 | -4.15712300 | 3.28535200  |
| H  | -2.17693700 | -5.79736500 | 1.66686900  |
| C  | -2.11632200 | 1.45327600  | -2.76331000 |
| H  | -1.88538000 | 0.53750700  | -2.19672700 |
| C  | -3.84611400 | -2.50652300 | -1.19011700 |
| H  | -3.82851100 | -1.40812900 | -1.24205900 |
| C  | -1.41366700 | -1.41331000 | 3.16044000  |
| H  | -0.91556100 | -0.63239600 | 2.56440100  |
| C  | -2.40457300 | 3.75482300  | 1.78851200  |
| H  | -2.43404000 | 2.71401700  | 2.14354500  |
| C  | -3.79872400 | 4.37227100  | 1.93276400  |
| H  | -4.10899500 | 4.37604800  | 2.98668300  |

|   |             |             |             |
|---|-------------|-------------|-------------|
| H | -3.79779500 | 5.41447400  | 1.58093600  |
| H | -4.56654500 | 3.83542900  | 1.35974400  |
| C | -1.42619400 | 4.51278000  | 2.68247000  |
| H | -1.68607500 | 4.34825400  | 3.73658600  |
| H | -0.39901600 | 4.16515700  | 2.52684300  |
| H | -1.46887600 | 5.59759900  | 2.50539500  |
| C | -3.60161200 | 1.42294200  | -3.13317200 |
| H | -3.87110400 | 2.32528600  | -3.70192600 |
| H | -3.82917000 | 0.54691900  | -3.75755900 |
| H | -4.24747200 | 1.38064100  | -2.24651900 |
| C | -1.27941000 | 1.43287400  | -4.03759300 |
| H | -0.20926500 | 1.58315300  | -3.83347700 |
| H | -1.40418700 | 0.46802200  | -4.55040000 |
| H | -1.59477400 | 2.21346700  | -4.74483000 |
| C | -5.30988900 | -2.94406600 | -1.13903500 |
| H | -5.85612500 | -2.57651400 | -2.01807100 |
| H | -5.39565400 | -4.04001800 | -1.12743700 |
| H | -5.81592700 | -2.56539300 | -0.24076700 |
| C | -3.17507000 | -3.01745600 | -2.46199700 |
| H | -3.76248100 | -2.72113700 | -3.34244500 |
| H | -2.16470500 | -2.60403100 | -2.57629400 |
| H | -3.09351800 | -4.11394200 | -2.47381000 |
| C | -0.36475300 | -1.97116600 | 4.11161200  |
| H | 0.44130100  | -2.49440500 | 3.57508700  |
| H | 0.08843500  | -1.14088700 | 4.67026700  |
| H | -0.79397200 | -2.66879500 | 4.84728200  |
| C | -2.52863400 | -0.74143600 | 3.96279700  |
| H | -3.26535600 | -0.24509900 | 3.31840000  |
| H | -3.05919700 | -1.47398800 | 4.59036300  |
| H | -2.09959200 | 0.02703000  | 4.62004200  |
| C | 3.07405200  | 1.54208500  | -0.86326300 |
| C | 2.17067900  | 2.58205700  | -1.10961300 |
| C | 4.37231200  | 1.63452200  | -1.38076900 |
| C | 2.56144000  | 3.69200400  | -1.85368300 |
| H | 1.15555300  | 2.50788900  | -0.71213600 |
| C | 4.76088400  | 2.74558000  | -2.12090400 |
| H | 5.08019300  | 0.82015300  | -1.22030500 |
| C | 3.85469500  | 3.77637400  | -2.35842100 |
| H | 1.84353400  | 4.49079300  | -2.03730000 |
| H | 5.77299400  | 2.80464900  | -2.51916000 |
| H | 4.15839700  | 4.64431900  | -2.94251600 |
| C | 3.33830000  | -1.31365300 | -0.72503500 |
| C | 3.77095800  | -2.41866700 | 0.01626100  |
| C | 3.42628700  | -1.37283000 | -2.12028500 |
| C | 4.28118300  | -3.54628300 | -0.61861500 |
| H | 3.71579000  | -2.39190700 | 1.10493700  |
| C | 3.93639800  | -2.50013300 | -2.75566300 |
| H | 3.10332000  | -0.51912800 | -2.71809900 |
| C | 4.36316800  | -3.59249900 | -2.00698000 |

|   |            |             |             |   |            |             |            |
|---|------------|-------------|-------------|---|------------|-------------|------------|
| H | 4.62120100 | -4.39219500 | -0.02239400 | H | 5.05042900 | 1.36459700  | 1.07270300 |
| H | 3.99929200 | -2.52375800 | -3.84337000 | C | 3.43749400 | -0.58358000 | 4.00596200 |
| H | 4.76648000 | -4.47412300 | -2.50331700 | H | 1.80704200 | -0.97104600 | 2.64292200 |
| C | 3.36560300 | 0.17165700  | 1.70592800  | C | 4.66618300 | 0.04747000  | 4.17883500 |
| C | 4.59405500 | 0.80666600  | 1.88954500  | H | 6.19484600 | 1.25203100  | 3.25541500 |
| C | 2.78708500 | -0.51062000 | 2.77999000  | H | 2.97495100 | -1.12109000 | 4.83326400 |
| C | 5.23876100 | 0.74756000  | 3.12191300  | H | 5.17368500 | 0.00115500  | 5.14145400 |

### Complex 12ct

E= -3013.79472466 a.u.

G= -3012.939576 a.u.

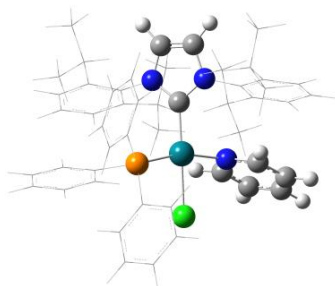

|    |             |             |             |   |             |             |             |
|----|-------------|-------------|-------------|---|-------------|-------------|-------------|
| Rh | 0.37802100  | -0.50659800 | -0.86155800 | C | -2.11211700 | -0.81852800 | 3.81146800  |
| Cl | -0.09935700 | -1.68677600 | -2.93875100 | H | -1.52356800 | -0.40262500 | 4.62972100  |
| P  | -1.80460900 | -0.92885000 | -0.32042900 | C | -3.28635300 | -1.51520800 | 4.07053500  |
| C  | 0.84209700  | 0.65066800  | 0.70113800  | H | -3.62977200 | -1.65297600 | 5.09472300  |
| N  | 1.80887300  | 0.41984400  | 1.66612200  | C | -4.01452500 | -2.04892100 | 3.00988300  |
| N  | 0.30775400  | 1.86776800  | 1.10548600  | H | -4.92746500 | -2.61067300 | 3.20226900  |
| C  | 1.82798500  | 1.41899100  | 2.63481100  | C | -3.57275000 | -1.88160800 | 1.70253800  |
| H  | 2.51033300  | 1.37640100  | 3.47371900  | H | -4.13547500 | -2.33422600 | 0.88597200  |
| C  | 0.89980000  | 2.32535100  | 2.28001000  | C | -2.40655900 | -2.53439200 | -0.99868000 |
| H  | 0.59856100  | 3.25721300  | 2.73958200  | C | -3.44146800 | -2.63474400 | -1.92621700 |
| C  | 2.89376700  | -0.51925600 | 1.58489500  | H | -3.92366200 | -1.73580400 | -2.30949400 |
| C  | 2.70262200  | -1.84628200 | 1.99733400  | C | -3.85430100 | -3.88418300 | -2.38406300 |
| C  | 3.80825500  | -2.69689500 | 1.98630900  | H | -4.65857300 | -3.94962900 | -3.11566100 |
| H  | 3.68776500  | -3.73220100 | 2.30241500  | C | -3.24089900 | -5.04022500 | -1.91791800 |
| C  | 5.05852000  | -2.24155500 | 1.58498700  | H | -3.56502600 | -6.01519200 | -2.27922900 |
| C  | 5.21990200  | -0.92747200 | 1.17068000  | C | -2.20429600 | -4.94570200 | -0.99183600 |
| H  | 6.20123200  | -0.58331800 | 0.84428400  | H | -1.71101000 | -5.84629200 | -0.62844000 |
| C  | 4.14188500  | -0.03910900 | 1.15161000  | C | -1.78922400 | -3.70127000 | -0.53997800 |
| C  | 1.35332800  | -2.31991000 | 2.47945500  | H | -0.96071000 | -3.62592400 | 0.16612500  |
| H  | 0.59726300  | -1.73640700 | 1.93566500  | N | 2.34187800  | -0.55256800 | -1.75423700 |
| C  | 4.35131000  | 1.39171200  | 0.69192600  | C | 2.54361500  | 0.12718400  | -2.89325200 |
| H  | 3.36309400  | 1.85101100  | 0.54354700  | C | 3.16209200  | -1.57897000 | -1.48666400 |
| C  | -0.60508600 | 2.69198400  | 0.35717900  | C | 3.57749300  | -0.15579100 | -3.77311300 |
| C  | -1.86671900 | 3.00338200  | 0.89450600  | H | 1.82035300  | 0.90807200  | -3.10902800 |
| C  | -2.72265600 | 3.79373700  | 0.12221300  | C | 4.21401000  | -1.93855600 | -2.31829300 |
| H  | -3.71537500 | 4.03016100  | 0.50346300  | H | 2.95587200  | -2.13513500 | -0.57349600 |
| C  | -2.32594600 | 4.29783500  | -1.10278600 | C | 4.43263600  | -1.21182900 | -3.48120600 |
| C  | -1.03765700 | 4.06089000  | -1.56569200 | H | 3.68810500  | 0.43424700  | -4.67980200 |
| H  | -0.72130700 | 4.50946200  | -2.50526400 | H | 4.84299000  | -2.78314600 | -2.04587400 |
| C  | -0.14699400 | 3.26711400  | -0.84701000 | H | 5.24952400  | -1.46909000 | -4.15311100 |
| C  | -2.27502800 | 2.67753900  | 2.32038100  | H | 5.91200500  | -2.91813300 | 1.59281700  |
| H  | -1.57790200 | 1.93185200  | 2.72708700  | H | -3.01301200 | 4.90381700  | -1.69212000 |
| C  | 1.30214200  | 3.15966300  | -1.28487200 | C | -3.68085700 | 2.10499300  | 2.46052100  |
| H  | 1.65153400  | 2.13530700  | -1.08024700 | H | -3.78821200 | 1.15837800  | 1.92053800  |
| C  | -3.00538200 | 0.26516100  | -1.05053000 | H | -3.90059400 | 1.91468300  | 3.52009800  |
| C  | -4.31301300 | 0.44556300  | -0.58918300 | H | -4.44673200 | 2.79887400  | 2.08609700  |
| H  | -4.66093700 | -0.09128500 | 0.29314600  | C | -2.15972900 | 3.94732400  | 3.17190900  |
| C  | -5.18777100 | 1.29927700  | -1.25366000 | H | -2.89990600 | 4.69493500  | 2.85266500  |
| H  | -6.20144500 | 1.43291100  | -0.87751000 | H | -2.34594600 | 3.72340700  | 4.23123200  |
| C  | -4.76986400 | 1.97038700  | -2.39909600 | H | -1.17242600 | 4.42252700  | 3.08916900  |
| H  | -5.45621400 | 2.63362400  | -2.92449200 | C | 1.20825900  | -2.04490100 | 3.97580000  |
| C  | -3.47407600 | 1.78879900  | -2.87155600 | H | 0.22040100  | -2.36685200 | 4.33394700  |
| H  | -3.13952800 | 2.31198800  | -3.76686100 | H | 1.97512000  | -2.59222000 | 4.54448700  |
| C  | -2.59369800 | 0.94668800  | -2.19960000 | H | 1.31876100  | -0.97492100 | 4.20505900  |
| H  | -1.57603700 | 0.79505400  | -2.56615300 | C | 1.07233200  | -3.78558500 | 2.17773500  |
| C  | -2.40289100 | -1.15909900 | 1.42229100  | H | 0.01945200  | -4.00838400 | 2.40384300  |
| C  | -1.67872900 | -0.64621600 | 2.49858000  | H | 1.25102200  | -4.02031500 | 1.11846800  |
| H  | -0.75309900 | -0.10866300 | 2.30796400  | H | 1.68411400  | -4.46427400 | 2.79010500  |

|   |            |            |             |
|---|------------|------------|-------------|
| C | 2.15643700 | 4.13865300 | -0.47188800 |
| H | 3.21010600 | 4.08665400 | -0.78411000 |
| H | 1.80880400 | 5.17004000 | -0.63267900 |
| H | 2.11622500 | 3.93456600 | 0.60699300  |
| C | 1.51509100 | 3.42535400 | -2.77064200 |
| H | 1.35583600 | 4.48298800 | -3.02584100 |
| H | 2.55220200 | 3.18442700 | -3.04514200 |
| H | 0.84182600 | 2.82209400 | -3.39686800 |

|   |            |            |             |
|---|------------|------------|-------------|
| C | 5.09242100 | 1.48898500 | -0.63938100 |
| H | 5.18105200 | 2.54279300 | -0.93992100 |
| H | 6.11438700 | 1.09017500 | -0.57243000 |
| H | 4.57030700 | 0.95320200 | -1.44116700 |
| C | 5.08995000 | 2.20669600 | 1.75482000  |
| H | 6.10075900 | 1.80665700 | 1.92157100  |
| H | 5.19189200 | 3.25294800 | 1.43397400  |
| H | 4.56656500 | 2.20041100 | 2.71954600  |

Complex **13at**

E= -2898.36088165 a.u.

G= -2897.545775 a.u.

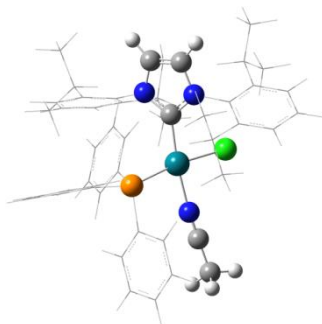

|    |             |             |             |
|----|-------------|-------------|-------------|
| Rh | 0.27786100  | -0.68320800 | -0.95136600 |
| Cl | 2.24838300  | -0.85771000 | -2.32420200 |
| P  | -1.76509100 | -0.67159400 | 0.06194600  |
| C  | 1.25525800  | 0.53246400  | 0.31672800  |
| N  | 2.36103600  | 0.19467000  | 1.06689900  |
| N  | 1.03274700  | 1.84984200  | 0.65600800  |
| C  | 2.76422600  | 1.25285800  | 1.87307800  |
| H  | 3.60806000  | 1.15548700  | 2.54287200  |
| C  | 1.94986700  | 2.29068100  | 1.60623900  |
| H  | 1.93026300  | 3.30371300  | 1.98466100  |
| C  | 3.22656100  | -0.94818500 | 0.88589000  |
| C  | 2.84664200  | -2.20085800 | 1.38521100  |
| C  | 3.73325200  | -3.26351900 | 1.22167500  |
| H  | 3.46305500  | -4.24867600 | 1.59891900  |
| C  | 4.95818900  | -3.08407700 | 0.59424400  |
| C  | 5.31420300  | -1.83265700 | 0.11644300  |
| H  | 6.27379000  | -1.69935700 | -0.38226600 |
| C  | 4.45630500  | -0.73924000 | 0.23821400  |
| C  | 1.55354000  | -2.38163200 | 2.14440700  |
| H  | 0.83109900  | -1.66686600 | 1.72644500  |
| C  | 4.89760000  | 0.60679400  | -0.30558900 |
| H  | 4.02217200  | 1.27218000  | -0.32947700 |
| C  | 0.12255000  | 2.75729400  | 0.00728600  |
| C  | -0.90872900 | 3.35893000  | 0.75015400  |
| C  | -1.75131800 | 4.25365500  | 0.08519000  |
| H  | -2.56581900 | 4.72425400  | 0.63507300  |
| C  | -1.56196100 | 4.56218700  | -1.25108300 |
| C  | -0.49479800 | 4.00772900  | -1.94443500 |
| H  | -0.32289400 | 4.28848800  | -2.98267100 |
| C  | 0.37690300  | 3.10618700  | -1.33530800 |
| C  | -1.06540000 | 3.20366700  | 2.25197800  |
| H  | -0.42362900 | 2.37820500  | 2.58882400  |
| C  | 1.61812800  | 2.64601100  | -2.07112500 |
| H  | 1.90981500  | 1.65567500  | -1.70211800 |
| C  | -2.90544500 | 0.65918900  | -0.51888300 |
| C  | -4.09222100 | 1.01738900  | 0.12832800  |
| H  | -4.34970800 | 0.56787000  | 1.08742900  |
| C  | -4.95925400 | 1.94070600  | -0.44629600 |
| H  | -5.87722200 | 2.21471300  | 0.07225800  |
| C  | -4.66056100 | 2.50322000  | -1.68448100 |
| H  | -5.34373000 | 3.22161100  | -2.13586100 |
| C  | -3.48509600 | 2.14903000  | -2.33840500 |
| H  | -3.23621900 | 2.59504400  | -3.30081900 |
| C  | -2.61005300 | 1.23664400  | -1.75651400 |
| H  | -1.67457500 | 0.96474900  | -2.25215900 |
| C  | -2.02946200 | -0.70790900 | 1.89057000  |
| C  | -1.05059200 | -0.18555600 | 2.73807100  |

|   |             |             |             |
|---|-------------|-------------|-------------|
| H | -0.12677200 | 0.20314000  | 2.31320400  |
| C | -1.23489900 | -0.15382900 | 4.11752300  |
| H | -0.45327200 | 0.26102400  | 4.75399700  |
| C | -2.40817600 | -0.65004000 | 4.67394600  |
| H | -2.55707300 | -0.62634600 | 5.75229000  |
| C | -3.38774900 | -1.19068500 | 3.84448600  |
| H | -4.30473900 | -1.59334700 | 4.27234300  |
| C | -3.19720900 | -1.22642800 | 2.46744000  |
| H | -3.96393200 | -1.66928500 | 1.83112900  |
| C | -2.74359600 | -2.16681000 | -0.42758900 |
| C | -3.79803200 | -2.11729800 | -1.34096700 |
| H | -4.14700700 | -1.15795800 | -1.72327100 |
| C | -4.41000400 | -3.29062600 | -1.78060700 |
| H | -5.23229100 | -3.23329500 | -2.49298100 |
| C | -3.98201200 | -4.52575000 | -1.30677900 |
| H | -4.46450700 | -5.44134900 | -1.64654200 |
| C | -2.93602000 | -4.58418600 | -0.38649700 |
| H | -2.59537600 | -5.54554400 | -0.00401600 |
| C | -2.32224800 | -3.41493900 | 0.04464600  |
| H | -1.49241200 | -3.46781300 | 0.75046900  |
| H | 5.63985000  | -3.92559500 | 0.47875300  |
| H | -2.23679500 | 5.25687700  | -1.75030100 |
| C | -2.48895600 | 2.88193900  | 2.69603000  |
| H | -2.84216100 | 1.93342600  | 2.27479300  |
| H | -2.52889500 | 2.79798600  | 3.79100500  |
| H | -3.19826000 | 3.66805300  | 2.40064700  |
| C | -0.58905200 | 4.48091100  | 2.95114400  |
| H | -1.24365700 | 5.32827400  | 2.70261600  |
| H | -0.60480300 | 4.35531100  | 4.04242900  |
| H | 0.42956900  | 4.76637700  | 2.65459600  |
| C | 1.76536900  | -2.06896200 | 3.62539600  |
| H | 0.82183700  | -2.16589400 | 4.18182400  |
| H | 2.49611700  | -2.76578000 | 4.06306000  |
| H | 2.14634400  | -1.04894900 | 3.77985900  |
| C | 0.93568200  | -3.76343800 | 1.98203600  |
| H | -0.06282900 | -3.77458300 | 2.44457600  |
| H | 0.83614700  | -4.02938100 | 0.92035700  |
| H | 1.52265400  | -4.54783300 | 2.48146600  |
| C | 2.76019300  | 3.62509400  | -1.78815200 |
| H | 3.68274700  | 3.28801900  | -2.28228400 |
| H | 2.51767000  | 4.62924200  | -2.16864100 |
| H | 2.96653800  | 3.71576600  | -0.71160500 |
| C | 1.42599500  | 2.47649600  | -3.57248400 |
| H | 1.29530500  | 3.43766000  | -4.09252100 |
| H | 2.31401500  | 1.98718900  | -3.99297600 |
| H | 0.56586600  | 1.83120100  | -3.79537200 |
| C | 5.43130200  | 0.52395100  | -1.73359000 |

|   |            |             |             |   |             |             |             |
|---|------------|-------------|-------------|---|-------------|-------------|-------------|
| H | 5.65538600 | 1.53491800  | -2.10338500 | C | -0.84765200 | -2.75043800 | -3.12885700 |
| H | 6.36616700 | -0.05214800 | -1.78805900 | C | -1.28337300 | -3.73765000 | -4.09404900 |
| H | 4.69245600 | 0.06238000  | -2.39900600 | H | -0.43332900 | -4.07971100 | -4.69448700 |
| C | 5.95400800 | 1.24085900  | 0.60201300  | H | -1.72228500 | -4.59563900 | -3.57171500 |
| H | 6.86497600 | 0.62494800  | 0.62608400  | H | -2.04102000 | -3.31365500 | -4.76275900 |
| H | 6.23413400 | 2.23590500  | 0.22874800  | N | -0.50099500 | -1.97888400 | -2.34006400 |
| H | 5.60832700 | 1.35423200  | 1.63832900  |   |             |             |             |

### Complex **13bt**

E= -2898.35914127 a.u.

G= -2897.550326 a.u.

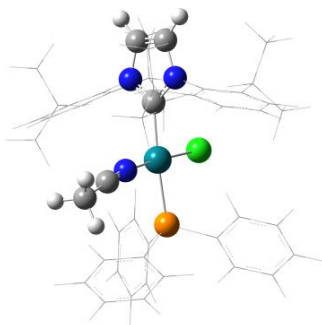

|    |             |             |             |   |             |             |             |
|----|-------------|-------------|-------------|---|-------------|-------------|-------------|
| Cl | 0.04043000  | 0.36434600  | -2.31782400 | H | 4.07074000  | 2.41655700  | 2.72129700  |
| C  | 4.03445300  | 1.00297000  | 0.01538100  | C | 0.73032900  | 2.40388500  | 3.68458400  |
| C  | 4.15184700  | -0.33998000 | -0.07301600 | H | -0.23238400 | 2.21923000  | 3.18652400  |
| H  | 4.77724200  | 1.78942800  | 0.03517900  | H | 0.84144600  | 1.68355000  | 4.50840100  |
| H  | 5.01808400  | -0.98206300 | -0.16585300 | H | 0.69951000  | 3.40445700  | 4.13859800  |
| C  | 1.93227000  | 0.13680700  | 0.07345300  | C | 4.19906200  | -2.49262900 | 2.81440800  |
| N  | 2.86091800  | -0.85560900 | -0.03449800 | H | 4.40148900  | -2.03059300 | 3.79072100  |
| N  | 2.67492900  | 1.28119300  | 0.09607900  | H | 4.46849500  | -3.55708300 | 2.88010200  |
| Rh | -0.09411700 | -0.00958800 | 0.04485300  | H | 4.86249300  | -2.02441700 | 2.07619400  |
| P  | -2.40072600 | -0.12365400 | -0.25750200 | C | 1.84458900  | -2.89732700 | 3.54848000  |
| C  | 2.12409600  | 2.60612500  | 0.19226600  | H | 1.94733900  | -2.27871000 | 4.45177900  |
| C  | 2.00554700  | 3.37765900  | -0.97501500 | H | 0.78768800  | -2.91724300 | 3.24992900  |
| C  | 1.72113900  | 3.07578600  | 1.45242300  | H | 2.13562500  | -3.91956800 | 3.82928400  |
| C  | 1.48517300  | 4.66637600  | -0.84162400 | C | 1.50904100  | -2.44652400 | -3.71664400 |
| C  | 1.20009100  | 4.36687400  | 1.52735100  | H | 0.48596800  | -2.38506200 | -3.32497300 |
| C  | 1.08507200  | 5.15779100  | 0.39218600  | H | 1.57839600  | -1.74365000 | -4.55685100 |
| H  | 1.38590400  | 5.29284800  | -1.72692300 | H | 1.68344200  | -3.45687200 | -4.11671200 |
| H  | 0.88179600  | 4.76241500  | 2.49103900  | C | 3.95366000  | -2.24958600 | -3.17896900 |
| H  | 0.67849400  | 6.16524000  | 0.47136400  | H | 4.70772600  | -1.90174000 | -2.45909700 |
| C  | 2.54712900  | -2.25581200 | -0.10476400 | H | 4.15854800  | -3.30984000 | -3.39100700 |
| C  | 2.45509100  | -2.98288000 | 1.09203200  | H | 4.09384700  | -1.68642600 | -4.11163100 |
| C  | 2.35709400  | -2.84326900 | -1.36384100 | C | -3.22834800 | 1.41151900  | -0.83054900 |
| C  | 2.15380800  | -4.34159400 | 1.00328600  | C | -2.43217500 | 2.50036000  | -1.19651900 |
| C  | 2.05507800  | -4.20627300 | -1.39715600 | C | -4.62156900 | 1.55359500  | -0.83639600 |
| C  | 1.95065600  | -4.94825800 | -0.22950900 | C | -3.01994700 | 3.69902200  | -1.59010300 |
| H  | 2.07931200  | -4.93542400 | 1.91343600  | H | -1.34731500 | 2.39471300  | -1.16896800 |
| H  | 1.90278700  | -4.69161500 | -2.36040300 | C | -5.20675500 | 2.74944400  | -1.23607700 |
| H  | 1.71540100  | -6.01068000 | -0.27902400 | H | -5.25317600 | 0.72768900  | -0.50517600 |
| C  | 1.89136200  | 2.24845900  | 2.70817500  | C | -4.40493500 | 3.82286600  | -1.61749600 |
| H  | 1.92048700  | 1.18981200  | 2.41442700  | H | -2.38676100 | 4.53902800  | -1.87305500 |
| C  | 2.72506300  | -2.33987200 | 2.43515300  | H | -6.29138000 | 2.84795100  | -1.24033900 |
| H  | 2.50493300  | -1.26542500 | 2.34386400  | H | -4.86389300 | 4.76098800  | -1.92715000 |
| C  | 2.52993200  | -2.06644000 | -2.65003300 | C | -3.41093100 | -0.49944500 | 1.23820600  |
| H  | 2.36867300  | -1.00110700 | -2.43133100 | C | -4.00088300 | -1.74144900 | 1.47587000  |
| C  | 2.43658400  | 2.86907200  | -2.33494300 | C | -3.50735700 | 0.49249900  | 2.22356800  |
| H  | 2.39983900  | 1.76894000  | -2.31028600 | C | -4.68827500 | -1.98207300 | 2.66556400  |
| C  | 3.86145900  | 3.32683300  | -2.65279800 | H | -3.93504100 | -2.52527200 | 0.72117400  |
| H  | 4.17395000  | 2.95939500  | -3.63980300 | C | -4.20093000 | 0.25722400  | 3.40387600  |
| H  | 3.91914100  | 4.42558800  | -2.66989300 | H | -3.03594300 | 1.46325000  | 2.05217200  |
| H  | 4.59313300  | 2.96993700  | -1.91611500 | C | -4.79605300 | -0.98447600 | 3.62836300  |
| C  | 1.49550100  | 3.30901100  | -3.45333000 | H | -5.15333600 | -2.95327000 | 2.83053300  |
| H  | 1.74643200  | 2.77130800  | -4.37700300 | H | -4.28053400 | 1.04485800  | 4.15273800  |
| H  | 0.45130700  | 3.07668500  | -3.21091200 | H | -5.34562000 | -1.17014100 | 4.55029000  |
| H  | 1.58406500  | 4.38444100  | -3.66786300 | C | -2.86876200 | -1.46464800 | -1.41812400 |
| C  | 3.21638500  | 2.59383300  | 3.38830300  | C | -3.96547400 | -1.42246600 | -2.27935100 |
| H  | 3.23596300  | 3.65395500  | 3.68122300  | C | -2.05393500 | -2.60371300 | -1.40553800 |
| H  | 3.36274600  | 1.98975400  | 4.29471300  | C | -4.25464000 | -2.50768100 | -3.10220100 |

|   |             |             |             |   |             |             |            |
|---|-------------|-------------|-------------|---|-------------|-------------|------------|
| H | -4.59059900 | -0.53139000 | -2.32432700 | C | -0.60100500 | -0.60155200 | 3.07274000 |
| C | -2.35044600 | -3.69005800 | -2.22053900 | C | -1.05144200 | -0.86507000 | 4.42471100 |
| H | -1.16672200 | -2.61841500 | -0.76497300 | H | -0.32896700 | -1.48736100 | 4.96662700 |
| C | -3.45288800 | -3.64375200 | -3.07005000 | H | -1.18894500 | 0.07616900  | 4.97318400 |
| H | -5.10922700 | -2.46144300 | -3.77583500 | H | -2.01903600 | -1.38430500 | 4.39477600 |
| H | -1.70667400 | -4.56856400 | -2.20341900 | N | -0.30089100 | -0.37768400 | 1.97094100 |
| H | -3.68128300 | -4.49053100 | -3.71589500 |   |             |             |            |

### Complex 17at

E= -2091.37531174 a.u.

G= -2090.769681 a.u.

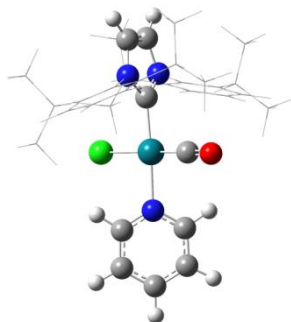

|    |             |             |             |   |             |             |             |
|----|-------------|-------------|-------------|---|-------------|-------------|-------------|
| Rh | 0.21365900  | 1.13028300  | -0.33568500 | C | 3.84946900  | -1.94574400 | -1.40387500 |
| Cl | 0.86196800  | 1.62976300  | 1.91847300  | H | 4.17691200  | -2.11103800 | -2.42908500 |
| N  | -1.38013800 | -1.26010200 | 0.69117300  | C | 4.79916700  | -1.77730600 | -0.40340700 |
| N  | 0.71592400  | -1.72025400 | 0.55576800  | H | 5.85911800  | -1.81026200 | -0.65171000 |
| C  | -0.18811800 | -0.73615500 | 0.29404700  | C | 4.40174700  | -1.56683400 | 0.90748600  |
| C  | 0.09817400  | -2.82679000 | 1.12600100  | H | 5.15368300  | -1.43175300 | 1.68406600  |
| H  | 0.66265800  | -3.70798800 | 1.40103700  | C | 3.04970600  | -1.51520500 | 1.25358800  |
| C  | -1.21611300 | -2.53482600 | 1.21781300  | C | 2.64582400  | -1.30577200 | 2.69698500  |
| H  | -2.05519900 | -3.09830700 | 1.60286800  | H | 1.59112600  | -0.99330700 | 2.71078400  |
| C  | -2.67353600 | -0.68947000 | 0.43139600  | C | 2.79355500  | -2.60542500 | 3.49020900  |
| C  | -3.34108700 | -1.09990100 | -0.73583800 | H | 3.84062500  | -2.94272700 | 3.49227300  |
| C  | -4.61626700 | -0.58343800 | -0.96071400 | H | 2.48817100  | -2.45587500 | 4.53466300  |
| H  | -5.16369000 | -0.88011000 | -1.85462000 | H | 2.18655700  | -3.42187400 | 3.07617200  |
| C  | -5.19458800 | 0.30612000  | -0.06396600 | C | 3.44463000  | -0.19217900 | 3.36827200  |
| H  | -6.19157100 | 0.69965300  | -0.25718600 | H | 4.49457700  | -0.47883600 | 3.52768600  |
| C  | -4.50772400 | 0.69420100  | 1.07718100  | H | 3.41133800  | 0.72870600  | 2.77501900  |
| H  | -4.97170000 | 1.38982100  | 1.77562800  | H | 3.01310800  | 0.02861700  | 4.35345200  |
| C  | -3.22944300 | 0.20449800  | 1.35383000  | C | 1.45796000  | -2.16786300 | -2.19853600 |
| C  | -2.51924300 | 0.59440300  | 2.63098700  | H | 0.54198700  | -1.62189400 | -1.93299700 |
| H  | -1.45860100 | 0.31761400  | 2.54119400  | C | 1.10834500  | -3.65519200 | -2.26994200 |
| C  | -2.55276300 | 2.09897600  | 2.87508800  | H | 1.99865000  | -4.25105300 | -2.52000100 |
| H  | -2.14725600 | 2.64140200  | 2.01133700  | H | 0.35074600  | -3.83670500 | -3.04634500 |
| H  | -1.93292100 | 2.34988700  | 3.74540800  | H | 0.70841600  | -4.02831200 | -1.31653900 |
| H  | -3.57123200 | 2.46471900  | 3.07308500  | C | 1.88389000  | -1.65507900 | -3.56880400 |
| C  | -3.11919900 | -0.16161700 | 3.81660300  | H | 2.20320400  | -0.60470300 | -3.52508700 |
| H  | -2.58402100 | 0.08819600  | 4.74251000  | H | 1.04254800  | -1.72275400 | -4.27087100 |
| H  | -3.06461200 | -1.25029500 | 3.67724100  | H | 2.70820500  | -2.24651100 | -3.99266200 |
| H  | -4.17842600 | 0.10044800  | 3.95804900  | N | 0.76130600  | 3.15851100  | -0.84047300 |
| C  | -2.73625300 | -2.09671400 | -1.70489000 | C | 1.51720000  | 3.42558800  | -1.91639300 |
| H  | -1.64387900 | -2.09209900 | -1.56201800 | C | 0.38182000  | 4.18103400  | -0.05954600 |
| C  | -3.00802700 | -1.75415600 | -3.16699100 | C | 1.91423600  | 4.71043900  | -2.25447200 |
| H  | -2.76796800 | -0.70981400 | -3.39584000 | H | 1.81119600  | 2.56602100  | -2.51695200 |
| H  | -2.39512900 | -2.39332600 | -3.81758400 | C | 0.72861700  | 5.49652800  | -0.33409200 |
| H  | -4.05826000 | -1.93593800 | -3.43692900 | H | -0.19956600 | 3.91098000  | 0.81975500  |
| C  | -3.23311700 | -3.51331300 | -1.40794100 | C | 1.50851300  | 5.76880900  | -1.45048100 |
| H  | -4.32582200 | -3.56861600 | -1.52024700 | H | 2.53028300  | 4.86996400  | -3.13579900 |
| H  | -2.98470700 | -3.83514100 | -0.38865300 | H | 0.39080900  | 6.28917500  | 0.32881900  |
| H  | -2.78425800 | -4.23296400 | -2.10688200 | H | 1.79747800  | 6.79044500  | -1.69011900 |
| C  | 2.11594500  | -1.69672300 | 0.22476800  | C | -0.35291700 | 0.79364400  | -2.03893400 |
| C  | 2.48644800  | -1.91398600 | -1.11417900 | O | -0.70142900 | 0.61593100  | -3.13549100 |

Complex **17bt**

E= -2091.35502564 a.u.

G= -2090.754067 a.u.

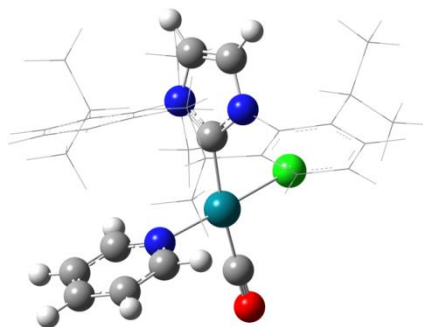

|    |             |             |             |   |             |             |             |
|----|-------------|-------------|-------------|---|-------------|-------------|-------------|
| Rh | -0.04260600 | -0.51037800 | 1.55273900  | C | 3.72957600  | 2.58918400  | 0.10712300  |
| Cl | 1.22162400  | -2.51862900 | 1.34153300  | H | 3.72401400  | 3.66218500  | 0.28836900  |
| N  | -0.52075400 | -0.75831700 | -1.48870400 | C | 4.88577400  | 1.86338200  | 0.37083100  |
| N  | 1.48880900  | -0.07707600 | -1.16500500 | H | 5.76600400  | 2.37018600  | 0.76365100  |
| C  | 0.31464400  | -0.30627200 | -0.51102300 | C | 4.92188300  | 0.50202400  | 0.12455900  |
| C  | 1.39289800  | -0.42462900 | -2.50776600 | H | 5.83340600  | -0.05948000 | 0.32526700  |
| H  | 2.23427900  | -0.32022900 | -3.18050300 | C | 3.80454400  | -0.17468400 | -0.37263300 |
| C  | 0.12891400  | -0.85383100 | -2.71203500 | C | 3.90281500  | -1.65217200 | -0.68216500 |
| H  | -0.37841700 | -1.20994200 | -3.59915400 | H | 2.88350000  | -2.03785200 | -0.82202200 |
| C  | -1.94776100 | -0.84847400 | -1.34618400 | C | 4.70051600  | -1.87199900 | -1.96892900 |
| C  | -2.70195600 | 0.28821400  | -1.68799600 | H | 5.73019600  | -1.50012500 | -1.86131600 |
| C  | -4.08836500 | 0.20919200  | -1.55166100 | H | 4.75518600  | -2.94259800 | -2.20781300 |
| H  | -4.70292700 | 1.07076900  | -1.81420500 | H | 4.25627500  | -1.35664400 | -2.83213000 |
| C  | -4.69452700 | -0.95536800 | -1.09696300 | C | 4.52409100  | -2.44366600 | 0.46507900  |
| H  | -5.77845800 | -1.00179800 | -1.00024400 | H | 5.58875700  | -2.20300800 | 0.60122400  |
| C  | -3.92324200 | -2.06520900 | -0.77742800 | H | 3.98911300  | -2.25648000 | 1.40328500  |
| H  | -4.40837400 | -2.97800700 | -0.43308500 | H | 4.45539300  | -3.51867100 | 0.25244700  |
| C  | -2.53129900 | -2.04051200 | -0.89714400 | C | 1.36953100  | 2.79158700  | -0.77613800 |
| C  | -1.71293300 | -3.27661100 | -0.60500900 | H | 0.46990000  | 2.21797200  | -0.49776400 |
| H  | -0.65856000 | -2.98173300 | -0.51347700 | C | 1.33735600  | 3.03199200  | -2.28916100 |
| C  | -2.09432000 | -3.93156300 | 0.71794900  | H | 2.23411100  | 3.58724300  | -2.60128300 |
| H  | -2.02351100 | -3.21239200 | 1.54523300  | H | 0.45709200  | 3.62978700  | -2.56983800 |
| H  | -1.39836200 | -4.75048900 | 0.93889800  | H | 1.30286000  | 2.09719600  | -2.86292600 |
| H  | -3.11093900 | -4.35186400 | 0.69639600  | C | 1.28464500  | 4.13998900  | -0.06678000 |
| C  | -1.83814900 | -4.26463300 | -1.76482800 | H | 1.42904000  | 4.05660200  | 1.01912300  |
| H  | -1.21627000 | -5.15049500 | -1.58041200 | H | 0.29815200  | 4.59009800  | -0.24533300 |
| H  | -1.51659700 | -3.81675200 | -2.71589300 | H | 2.03526100  | 4.84723600  | -0.44768100 |
| H  | -2.87793800 | -4.60229300 | -1.89030800 | C | -0.23948800 | -0.91302000 | 3.37671800  |
| C  | -2.06290900 | 1.54813800  | -2.23934500 | O | -0.33228300 | -1.19237800 | 4.49355200  |
| H  | -0.97480300 | 1.46519800  | -2.11441000 | N | -1.28041300 | 1.18000100  | 1.73823000  |
| C  | -2.49309600 | 2.81344000  | -1.50432000 | C | -0.77896200 | 2.39018800  | 2.03246100  |
| H  | -2.20929400 | 2.78040700  | -0.44443900 | C | -2.61613000 | 1.03810000  | 1.69192100  |
| H  | -2.01339000 | 3.69338400  | -1.95649100 | C | -1.58335200 | 3.49103900  | 2.29278100  |
| H  | -3.57905300 | 2.97603600  | -1.55599500 | H | 0.30778900  | 2.45022300  | 2.06961800  |
| C  | -2.33832600 | 1.67709600  | -3.73768300 | C | -3.48712900 | 2.08837300  | 1.94485400  |
| H  | -3.41098700 | 1.82068900  | -3.93284600 | H | -2.98006000 | 0.03920700  | 1.45646700  |
| H  | -2.01862000 | 0.78163300  | -4.28709800 | C | -2.96502400 | 3.33869900  | 2.25455300  |
| H  | -1.80191700 | 2.54098200  | -4.15482800 | H | -1.12097300 | 4.44794400  | 2.52492700  |
| C  | 2.64638400  | 0.57630200  | -0.61058300 | H | -4.55948800 | 1.91543300  | 1.89309500  |
| C  | 2.58767700  | 1.96906800  | -0.39590100 | H | -3.62265800 | 4.18072400  | 2.46118100  |

Complex **20at**

E= -2110.73142661 a.u.

G= -2110.092055 a.u.

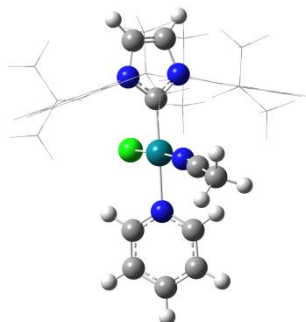

|    |             |             |             |   |             |             |             |
|----|-------------|-------------|-------------|---|-------------|-------------|-------------|
| Rh | -0.11576900 | 1.13535400  | 0.03635300  | C | -4.97070000 | -1.36461700 | 0.55517300  |
| Cl | -0.57399400 | 1.33259600  | -2.29533800 | H | -6.02734800 | -1.30467300 | 0.81273100  |
| N  | 1.21697600  | -1.50780700 | -0.61489200 | C | -4.57960500 | -1.34260700 | -0.77391800 |
| N  | -0.91280400 | -1.73137200 | -0.43097600 | H | -5.33299700 | -1.25687200 | -1.55639000 |
| C  | 0.08678000  | -0.80776300 | -0.29131900 | C | -3.23119300 | -1.42163600 | -1.13203500 |
| C  | -0.41566500 | -2.95931700 | -0.85376200 | C | -2.83069300 | -1.40763000 | -2.59153900 |
| H  | -1.06988300 | -3.80422900 | -1.02498400 | H | -1.74945600 | -1.21196500 | -2.64427900 |
| C  | 0.92054900  | -2.81835500 | -0.97232100 | C | -3.12645000 | -2.75769400 | -3.24566400 |
| H  | 1.69535900  | -3.51115200 | -1.27420900 | H | -4.20317900 | -2.98183000 | -3.21281500 |
| C  | 2.55894200  | -1.04142500 | -0.42208000 | H | -2.81849400 | -2.75066600 | -4.30004300 |
| C  | 3.14726200  | -1.25126800 | 0.83620100  | H | -2.60266400 | -3.58547200 | -2.74770000 |
| C  | 4.46531500  | -0.83308400 | 1.01149800  | C | -3.51462100 | -0.28250400 | -3.36218900 |
| H  | 4.95385800  | -0.98265300 | 1.97447300  | H | -4.59722300 | -0.44999100 | -3.46281100 |
| C  | 5.16473200  | -0.22884100 | -0.02632700 | H | -3.34440600 | 0.68384800  | -2.87318000 |
| H  | 6.19408500  | 0.09212100  | 0.12854200  | H | -3.09633100 | -0.21991400 | -4.37561400 |
| C  | 4.55826300  | -0.03812900 | -1.25956400 | C | -1.62285100 | -1.69042900 | 2.35621000  |
| H  | 5.11614600  | 0.43318100  | -2.06845700 | H | -0.70274200 | -1.20620000 | 2.00087600  |
| C  | 3.24004500  | -0.44000500 | -1.48661800 | C | -1.30598600 | -3.16015600 | 2.63222000  |
| C  | 2.60857400  | -0.27871700 | -2.85035200 | H | -2.19961400 | -3.69119500 | 2.99288300  |
| H  | 1.51917500  | -0.37699300 | -2.74035200 | H | -0.52340100 | -3.24793200 | 3.40148400  |
| C  | 2.85884100  | 1.09878100  | -3.45279200 | H | -0.94564900 | -3.67590100 | 1.73156500  |
| H  | 2.54475100  | 1.88986700  | -2.76032000 | C | -2.01117800 | -0.98053700 | 3.64697800  |
| H  | 2.27172800  | 1.21243000  | -4.37306800 | H | -2.28686500 | 0.06674700  | 3.45648300  |
| H  | 3.91720300  | 1.25430400  | -3.71061900 | H | -1.16092100 | -0.99351400 | 4.34561100  |
| C  | 3.10520800  | -1.37941700 | -3.78843500 | H | -2.85179800 | -1.47111600 | 4.15874500  |
| H  | 2.63564600  | -1.28495500 | -4.77687400 | N | -0.42102200 | 3.25731000  | 0.20137500  |
| H  | 2.87585200  | -2.38153900 | -3.39967600 | C | -1.19375900 | 3.77392200  | 1.16830300  |
| H  | 4.19546600  | -1.31810600 | -3.92503800 | C | 0.12386200  | 4.09939700  | -0.69007400 |
| C  | 2.40220900  | -1.94715600 | 1.95633900  | C | -1.44080100 | 5.13339500  | 1.29130900  |
| H  | 1.32341500  | -1.83694400 | 1.76712000  | H | -1.63189100 | 3.05264900  | 1.85730400  |
| C  | 2.68262600  | -1.33788400 | 3.32652100  | C | -0.06679400 | 5.47332200  | -0.63350500 |
| H  | 2.63277100  | -0.24188700 | 3.29300100  | H | 0.70962700  | 3.63060000  | -1.47829300 |
| H  | 1.94322400  | -1.70543700 | 4.05492500  | C | -0.86180800 | 6.00352200  | 0.37466300  |
| H  | 3.67583500  | -1.61820300 | 3.70586400  | H | -2.08307300 | 5.49587100  | 2.09072900  |
| C  | 2.72666300  | -3.44142900 | 1.98008000  | H | 0.40106500  | 6.11123600  | -1.37942900 |
| H  | 3.80529500  | -3.59711400 | 2.12917500  | H | -1.03298500 | 7.07641300  | 0.44249900  |
| H  | 2.44059300  | -3.93634500 | 1.04362300  | N | 0.26164200  | 1.10620200  | 1.96676900  |
| H  | 2.19531000  | -3.94391700 | 2.80089900  | C | 0.42934200  | 1.23908700  | 3.11300600  |
| C  | -2.29468900 | -1.53539500 | -0.09719000 | C | 0.63655000  | 1.43182500  | 4.53615900  |
| C  | -2.66017500 | -1.54771800 | 1.26109000  | H | 1.31278100  | 2.27637300  | 4.71698600  |
| C  | -4.01738700 | -1.45996300 | 1.56282700  | H | -0.31457800 | 1.63390000  | 5.04537500  |
| H  | -4.34011900 | -1.47118900 | 2.60298100  | H | 1.08196600  | 0.53551000  | 4.98584000  |

Complex **20bt**

E= -2110.72755809 a.u.

G= -2110.089848 a.u.

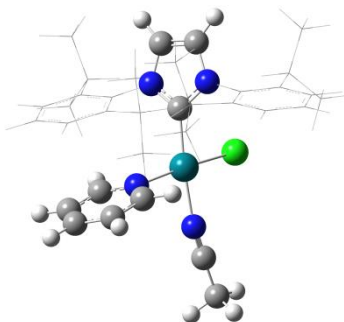

|    |             |             |             |   |             |             |             |
|----|-------------|-------------|-------------|---|-------------|-------------|-------------|
| Rh | -0.05597300 | -0.92319700 | 1.00301600  | C | 4.91005700  | 1.60899900  | 1.20398300  |
| Cl | 1.36484900  | -2.65449800 | 0.17731100  | H | 5.77972900  | 1.89604300  | 1.79377200  |
| N  | -0.42422100 | 0.10190900  | -1.79169100 | C | 4.97523100  | 0.51430100  | 0.35906500  |
| N  | 1.56756100  | 0.55217500  | -1.11337600 | H | 5.89996200  | -0.05720700 | 0.28856700  |
| C  | 0.37071600  | 0.04412800  | -0.67613200 | C | 3.87456000  | 0.12048300  | -0.40714100 |
| C  | 1.51539600  | 0.87443700  | -2.46639200 | C | 4.00859900  | -1.05247600 | -1.35545400 |
| H  | 2.37428700  | 1.28316400  | -2.98228200 | H | 2.99777900  | -1.35976700 | -1.65781400 |
| C  | 0.26781300  | 0.59028300  | -2.89305700 | C | 4.80742600  | -0.64757200 | -2.59576100 |
| H  | -0.20277900 | 0.68553100  | -3.86307500 | H | 5.83399200  | -0.35934400 | -2.32426900 |
| C  | -1.84726500 | -0.05766300 | -1.77224200 | H | 4.87271300  | -1.48704300 | -3.30128000 |
| C  | -2.62872100 | 1.10252100  | -1.62530700 | H | 4.36022900  | 0.20376600  | -3.12650600 |
| C  | -4.01634700 | 0.95700600  | -1.64917600 | C | 4.65600500  | -2.26560800 | -0.69344800 |
| H  | -4.65005800 | 1.83893500  | -1.55275200 | H | 5.71396200  | -2.08659200 | -0.45070000 |
| C  | -4.59834600 | -0.29601800 | -1.79299900 | H | 4.11573600  | -2.54376500 | 0.21853600  |
| H  | -5.68334500 | -0.39239000 | -1.81171100 | H | 4.61854200  | -3.12323400 | -1.37858700 |
| C  | -3.80073400 | -1.42661200 | -1.91693600 | C | 1.36632000  | 2.87450000  | 0.59234500  |
| H  | -4.26690100 | -2.40534700 | -2.03051100 | H | 0.48901100  | 2.20907900  | 0.53865000  |
| C  | -2.40647600 | -1.33432000 | -1.91412500 | C | 1.33197700  | 3.82415500  | -0.60896200 |
| C  | -1.55345600 | -2.56821400 | -2.09932100 | H | 2.20488200  | 4.49346200  | -0.58773200 |
| H  | -0.51519900 | -2.31408000 | -1.84727900 | H | 0.42726200  | 4.45060800  | -0.58515400 |
| C  | -1.95506200 | -3.69873200 | -1.15809100 | H | 1.34177600  | 3.28811700  | -1.56707400 |
| H  | -1.94481800 | -3.35490700 | -0.11411600 | C | 1.23225600  | 3.69221100  | 1.87365300  |
| H  | -1.22807700 | -4.51712900 | -1.23688600 | H | 1.37921300  | 3.08124200  | 2.77481200  |
| H  | -2.95044000 | -4.10540600 | -1.39344800 | H | 0.23116000  | 4.14346000  | 1.92615100  |
| C  | -1.59633900 | -3.01554300 | -3.55963800 | H | 1.95747000  | 4.51801900  | 1.91053200  |
| H  | -0.94535800 | -3.88630600 | -3.71353800 | N | -1.47247100 | 0.38777300  | 1.79167600  |
| H  | -1.25749000 | -2.21507700 | -4.23282600 | C | -1.15460700 | 1.30110300  | 2.72662800  |
| H  | -2.61604400 | -3.29812600 | -3.86222300 | C | -2.77799600 | 0.17268800  | 1.54195900  |
| C  | -2.00474800 | 2.47715200  | -1.48173000 | C | -2.10822900 | 2.02751300  | 3.42616600  |
| H  | -0.93765900 | 2.34373300  | -1.25497000 | H | -0.08939700 | 1.42847100  | 2.91007200  |
| C  | -2.59574300 | 3.29331200  | -0.33604400 | C | -3.79078500 | 0.85186400  | 2.20506200  |
| H  | -2.46166500 | 2.79276900  | 0.63164600  | H | -2.99635100 | -0.57835800 | 0.78411500  |
| H  | -2.09709300 | 4.27163000  | -0.27941900 | C | -3.45536200 | 1.80075200  | 3.16432600  |
| H  | -3.66956900 | 3.48652200  | -0.47252000 | H | -1.78693500 | 2.75695900  | 4.16667600  |
| C  | -2.10607500 | 3.25428000  | -2.79416900 | H | -4.82715700 | 0.63648700  | 1.95367500  |
| H  | -3.15712000 | 3.45064600  | -3.05265400 | H | -4.22769900 | 2.35414900  | 3.69523500  |
| H  | -1.65543800 | 2.70136100  | -3.62845200 | N | -0.36464600 | -2.14517000 | 2.63515900  |
| H  | -1.59157000 | 4.22228500  | -2.71175700 | C | -0.40085200 | -2.96655900 | 3.45175500  |
| C  | 2.70011600  | 0.87642300  | -0.29009100 | C | -0.41821300 | -4.01426200 | 4.45269900  |
| C  | 2.61034700  | 2.00573900  | 0.54910600  | H | 0.12435500  | -3.70062300 | 5.35184400  |
| C  | 3.73635200  | 2.34772800  | 1.29490900  | H | -1.44648800 | -4.26740100 | 4.73433400  |
| H  | 3.70365700  | 3.21379700  | 1.95369700  | H | 0.06484800  | -4.91257300 | 4.05220600  |



### Cyclooctene

E= -312.99419311 a.u.

G= -312.822133 a.u.

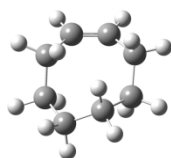

|   |             |             |             |   |             |             |             |
|---|-------------|-------------|-------------|---|-------------|-------------|-------------|
| C | -1.93665100 | -0.08563800 | -0.19684700 | H | -2.09416600 | 2.01861000  | -0.06184000 |
| C | -1.36353500 | 1.24523600  | 0.21174600  | H | 1.75003700  | -2.14128300 | -0.58607300 |
| C | 1.09365500  | -1.26714700 | -0.46986800 | H | 0.02294900  | 2.74897500  | -0.41173100 |
| C | 0.00306100  | 1.65026300  | -0.37984300 | H | 2.70007700  | -0.35861100 | 0.64874900  |
| C | 1.96319100  | -0.06143300 | -0.11436900 | H | 1.97341900  | 1.99316800  | 0.43754300  |
| C | 1.23518900  | 1.17833700  | 0.40471700  | H | 0.94525000  | 1.02355300  | 1.45622300  |
| H | -1.28867800 | 1.29904800  | 1.31164600  | C | -1.38925600 | -1.29057800 | -0.02623200 |
| H | 0.06484300  | 1.32373800  | -1.42959000 | H | -1.94629000 | -2.15577600 | -0.39298700 |
| H | 0.63677300  | -1.10922200 | -1.45759800 | C | -0.03039000 | -1.57058800 | 0.54553900  |
| H | 2.55151700  | 0.21165200  | -1.00462100 | H | 0.12696200  | -0.97620400 | 1.45951100  |
| H | -2.91522900 | -0.04814300 | -0.68056000 | H | 0.02094700  | -2.62021900 | 0.86226100  |

### Pyridine

E= -248.09379637 a.u.

G= -248.032669 a.u.

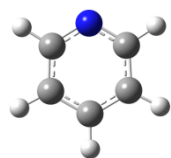

|   |             |             |             |   |             |             |             |
|---|-------------|-------------|-------------|---|-------------|-------------|-------------|
| C | -1.13780000 | -0.71919000 | -0.00021400 | H | -0.00001000 | 2.46803700  | 0.00016200  |
| C | -1.19473700 | 0.67048000  | -0.00012500 | H | -2.05799500 | -1.30655300 | -0.00036800 |
| C | 0.00000400  | 1.37937400  | 0.00010600  | H | -2.15526600 | 1.18113300  | -0.00025400 |
| C | 1.19473500  | 0.67048300  | 0.00021700  | H | 2.15530700  | 1.18106700  | 0.00035500  |
| C | 1.13780000  | -0.71918600 | 0.00011300  | H | 2.05797500  | -1.30656300 | 0.00017300  |
| N | -0.00000300 | -1.41555500 | -0.00009200 |   |             |             |             |

### Ethylene

E= -78.51258629 a.u.

G= -78.483936 a.u.

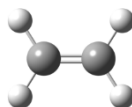

|   |             |            |             |   |             |             |             |
|---|-------------|------------|-------------|---|-------------|-------------|-------------|
| C | 0.66326900  | 0.00000000 | 0.00000300  | H | 1.23977500  | -0.92365000 | 0.00002400  |
| C | -0.66326900 | 0.00000000 | -0.00000400 | H | -1.23977500 | -0.92365000 | 0.00001100  |
| H | 1.23977500  | 0.92365000 | -0.00001000 | H | -1.23977500 | 0.92365000  | -0.00002200 |

### Acetonitrile

E= -132.65684412 a.u.

G= -132.634287 a.u.

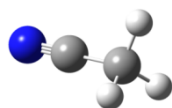

|   |            |             |             |
|---|------------|-------------|-------------|
| C | 0.00000000 | 0.00000000  | -1.17522000 |
| H | 0.00000000 | 1.02626500  | -1.55829600 |
| H | 0.88877100 | -0.51313200 | -1.55829600 |

|   |             |             |             |
|---|-------------|-------------|-------------|
| H | -0.88877100 | -0.51313200 | -1.55829600 |
| C | 0.00000000  | 0.00000000  | 0.27734500  |
| N | 0.00000000  | 0.00000000  | 1.43744800  |
